# Supplementary material for: Fulleride superconductivity tuned by elastic strain due to cation compositional disorder
Source: Royal Society of Chemistry journal article supplement (doi:10.1039/d4sc03399j), 2024-01-01
Supplement: d4sc03399j1.pdf [file d4sc03399j1.pdf]

## Fulleride superconductivity tuned by elastic strain due to cation compositional disorder

H. Esma Okur,<sup>a</sup> Ross H. Colman,<sup>b</sup> Yasuhiro Takabayashi,<sup>c</sup> Peter Jeglič,<sup>d</sup> Yasuo Ohishi,<sup>e</sup> Kenichi Kato,<sup>f</sup>  
Denis Arčon,<sup>d,g</sup> Yoshiki Kubota,<sup>h</sup> and Kosmas Prassides\*<sup>d,h,i</sup>

---

<sup>a</sup> *Department of Chemistry, Faculty of Engineering and Natural Sciences, Bursa Technical University, TR-16310 Bursa, Turkey*

<sup>b</sup> *Department of Condensed Matter Physics, Faculty of Mathematics and Physics, Charles University, 121 16 Prague, Czech Republic*

<sup>c</sup> *Department of Physical Science and Engineering, Nagoya Institute of Technology, Nagoya 466-8555, Japan*

<sup>d</sup> *Jozef Stefan Institute, Jamova c. 39, SI-1000 Ljubljana, Slovenia*

<sup>e</sup> *Japan Synchrotron Radiation Facility, SPring-8, Hyogo 679-5198, Japan*

<sup>f</sup> *RIKEN SPring-8 Center, Hyogo 679-5148, Japan*

<sup>g</sup> *Faculty of Mathematics and Physics, University of Ljubljana, Jadranska 19, SI-1000 Ljubljana, Slovenia*

<sup>h</sup> *Department of Physics, Graduate School of Science, Osaka Metropolitan University, Osaka 599-8531, Japan*

<sup>i</sup> *Faculty of Engineering, Kyoto University of Advanced Science, Kameoka 621-8555, Japan*

## Experimental Methods

**Synthesis and characterization.** The synthesis of  $K_xCs_{3-x}C_{60}$  samples with nominal  $x$  varying between 0.12 and 2 was performed as follows: stoichiometric quantities of phase-pure powders of  $K_6C_{60}$ ,  $Cs_6C_{60}$  and sublimed  $C_{60}$  were mixed, ground, pressed into a pellet, placed in a Ta cell with tightened screw ends and introduced in a Pyrex glass ampoule in an Ar-filled glove box ( $H_2O < 0.3$  ppm,  $O_2 < 0.1$  ppm). After removal from the glove box, the ampoule was evacuated for 30 min before sealing under 400 mbar of He gas pressure. The sealed samples were heated inside a furnace using the following thermal protocol: heating from room temperature to 200°C at 5°C/min; held for 3 hrs; to 300°C at 5°C/min; held for 18 hrs; to 350°C at 5°C/min; held for 5 days, cooling to room temperature at 5°C/min. Once the initial annealing was complete, the product was then removed from the reaction vessel in the glove box, ground, pressed into a pellet, inserted into the same Ta cell for a further period of 6+6+6 days annealing at 430°C with 3 intermediate grindings and pelletizations to improve crystallinity.

Laboratory XRPD using a Bruker D8 ADVANCE with DAVINCI design powder X-ray diffractometer, configured with a Debye-Scherrer geometry and a copper source  $Cu K_{\alpha 1} = 1.5406 \text{ \AA}$  was used to routinely check the quality of all intermediate polycrystalline products.

All samples are stable and do not degrade with time as long as they are stored and handled in a strictly moisture- and oxygen-free atmosphere.

**Synchrotron X-ray powder diffraction and thermodiffraction at ambient pressure.** All samples were investigated by high-resolution synchrotron X-ray powder diffraction (SXRPD). Diffraction data were collected in continuous scanning mode at various temperatures between 10 and 300 K for samples with nominal compositions,  $K_xCs_{3-x}C_{60}$  ( $0.12 \leq x \leq 2$ ) sealed in 0.5-mm diameter thin-wall glass capillaries under 300 mbar of helium gas and introduced in a helium-flow cryostat with the diffractometer on either the ID31 or the ID22 beamline at the ESRF, Grenoble, France. The wavelengths used for each sample are as follows:  $x = 0.12$ :  $\lambda = 0.39999 \text{ \AA}$  at 300 K (ID31);  $x = 0.25$ :  $\lambda = 0.39999 \text{ \AA}$  between 40 and 300 K (ID31);  $x = 0.35$ :  $\lambda = 0.39984 \text{ \AA}$  at 300 K (ID31);  $x = 0.5$ :  $\lambda = 0.39984 \text{ \AA}$  between 10 and 300 K (ID31);  $x = 0.75$ :  $\lambda = 0.39984 \text{ \AA}$  between 10 and 300 K (ID31);  $x = 1$ :  $\lambda = 0.35419 \text{ \AA}$  at 300 K (ID22);  $x = 1.5$ :  $\lambda = 0.39996 \text{ \AA}$  at 300 K (ID31);  $x = 2$ :  $\lambda = 0.35419 \text{ \AA}$  at 300 K (ID22). Additional high-resolution SXRPD data were collected at various temperatures between 112 and 300 K ( $\lambda = 0.81887 \text{ \AA}$ ) for the sample with nominal K content,  $x = 1$  sealed in a 0.3-mm diameter thin-wall glass capillary under 350 mbar of helium gas with the diffractometer on the BL44B2 beamline at SPring-8, Japan. Data analysis of the SXRPD profiles was performed with the GSAS suite of Rietveld programs. The anomalous contributions,  $f'$  and  $f''$  to the X-ray form factors of all atoms were calculated with the program DISPANO and were input into the GSAS

refinements. Cylindrical absorption correction, given as  $\mu r \lambda$  in GSAS, was also applied for each sample ( $\mu r$  = linear absorption coefficient  $\times$  sample radius, are 0.08-0.1). Thermal displacement parameters of atoms in the majority phases were modelled as isotropic and allowed to refine.

The temperature dependence of the unit cell dimensions – reflecting the anharmonicity of the lattice vibrations – can be accounted for using a Debye model in which the phonon density-of-states is represented by a distribution of phonon frequencies. Fitting of the temperature variation of the unit cell volume,  $V$  was performed with the following function [1]:

$$V = V_0 + I_V T \phi(\Theta_D/T), \quad (1)$$

where  $V_0$  is the unit cell volume at 0 K,  $\Theta_D$  is the Debye temperature,  $I_V = 3k_B r K \gamma$  ( $K$  is the isothermal volume compressibility,  $\gamma$  the Grüneisen parameter,  $r$  the number of atoms in the primitive cell, and  $k_B$  the Boltzmann constant), and  $\phi(\Theta_D/T)$  is an approximate analytical function of  $\Theta_D$  and  $T$  valid for  $T \geq \Theta_D/10$ . The derived parameters from the fits to the thermal expansion data of the studied  $K_xCs_{3-x}C_{60}$  compositions are summarized in Table S10.

**High-pressure synchrotron X-ray powder diffraction.** Pressure-dependent high-resolution SXRPD data were collected at 7 K for samples of composition  $K_xCs_{3-x}C_{60}$  with  $x_K = 0.35$  ( $\lambda = 0.41261$  Å,  $P \leq 10.2$  GPa), 0.87 ( $\lambda = 0.41238$  Å,  $P \leq 9.8$  GPa), and 1.28 ( $\lambda = 0.41238$  Å,  $P \leq 9.8$  GPa) on beamline BL10XU, SPring-8. The powder samples were loaded in a helium-gas-driven membrane diamond anvil cell (MDAC), which was equipped with stainless steel gasket with a hole 100  $\mu\text{m}$  deep and 200  $\mu\text{m}$  in diameter and placed inside a closed-cycle helium refrigerator. The MDAC diamond culet diameters were 500  $\mu\text{m}$ . Helium gas in the MDAC was used as a pressure medium. The applied pressure was increased at 7 K by controlling the He gas pressure to the membrane of the MDAC with the cell inside the cryostat and was measured with the ruby fluorescence method. Images were collected using a monochromatic beam focused to  $40 \times 40$   $\mu\text{m}^2$  on a flat image plate detector (Rigaku R-Axis IV++,  $300 \times 300$   $\text{mm}^2$  area, 0.100 mm pixel size) with 2 min exposure time. Masking of the strong Bragg reflections of the diamond anvil and integration of the two-dimensional diffraction images were performed with the WinPIP software. Data analysis of the resulting one-dimensional diffraction profiles was carried out with the GSAS suite of Rietveld analysis programs. The same structural model as that used in the Rietveld analysis of the ambient pressure data was employed. There were, however, some differences in the employed methodology: isotropic thermal displacement parameters of carbon were only allowed to refine at the lowest pressure (typically  $\sim 0.3$  GPa) and then fixed at all other pressures. The  $K^+/Cs^+$  site occupancies in the *fcc* phase were fixed to the values found at ambient pressure and 300 K and were not refined thereafter. No absorption correction was employed, in contrast to the procedure for the ambient pressure data analysis.

The non-linear pressure dependence of the low-temperature unit cell volume of the  $K_xCs_{3-x}C_{60}$  compositions as extracted from the Rietveld refinements of the diffraction profiles was fitted with the semiempirical second-order Murnaghan equation-of-state (EoS) [2]:

$$P = (K_0/K'_0) [(V_0/V)^{K'_0} - 1], \quad (2)$$

where  $K_0$  is the zero-pressure isothermal bulk modulus,  $K'_0$  is its pressure derivative ( $= dK_0/dP$ ) $_{P=0}$ , and  $V_0$  is the unit cell volume at zero pressure (Fig. S20, Table S14). This EoS, whilst having the advantage of algebraic simplicity over other commonly used EoS formulations, models the low-temperature  $K_xCs_{3-x}C_{60}$  compressibility data well. The extracted values of  $K_0$  and  $K'_0$  for the  $x_K = 0.35, 0.87,$  and  $1.28$  compositions were used to estimate the corresponding  $V(P)$  functions for the  $x_K = 0.53, 0.64,$  and  $2$  compositions, respectively for which no high-pressure diffraction data were available.

**Magnetic measurements.** Temperature-dependent magnetic susceptibility,  $\chi$ , was measured at 3 and 5 T under field-cooled (FC) protocol at temperatures between 1.8 and 300 K in order to investigate the magnetic susceptibility behaviour in the normal state. The  $\chi(T)$  data were obtained from the difference in magnetization at 5 and 3 T to subtract out adventitious ferromagnetic impurity contributions. Corrections for the core diamagnetic contributions to the susceptibility of  $C_{60}^{3-}$  ( $-2.43 \times 10^{-4}$  emu mol $^{-1}$ ),  $K^+$  and  $Cs^+$  ( $-0.149 \times 10^{-4}$  and  $-0.35 \times 10^{-4}$  emu mol $^{-1}$ , respectively) were applied to all datasets (Fig. S23).

**NMR spectroscopy.**  $^{39}K$  and  $^{133}Cs$  NMR spectra of  $K_{3-x}Cs_xC_{60}$  samples measured at room temperature are shown in Fig. 1b and S2, respectively. The spectral intensity distribution in both cases reflects the two available alkali metal interstices in the *fcc* structure, namely the larger octahedral (O) and the smaller tetrahedral (T) sites. This is particularly evident in the spectrum of the least-expanded  $K_3C_{60}$  phase (Fig. 1b). Notably, however, the  $^{133}Cs$  NMR spectrum of  $K_{0.53}Cs_{2.47}C_{60}$  (Fig. S2) shows a shoulder on the high-frequency side of the T-peak. Such a splitting of the T-peak is even more pronounced for the  $Cs_3C_{60}$  sample (Fig. S2). This is the so-called T-T' splitting first reported by Walstedt *et al.* in  $Rb_3C_{60}$  [3]. We have previously studied as a function temperature in detail the T-T' splitting for  $Cs_3C_{60}$  using the magic angle spinning (MAS) NMR technique [4] and demonstrated that it originates from the presence of  $C_{60}^{3-}$  merohedral disorder. In  $K_{0.53}Cs_{2.47}C_{60}$ , in addition to the  $C_{60}^{3-}$  merohedral disorder, there is also structural disorder associated with the random occupation of the O-sites by  $K^+$  and  $Cs^+$  ions. The latter results in the broadening of the observed alkali NMR peaks (Fig. S4), but does not entirely remove the inherent T-T' splitting.

The temperature evolution of the  $^{133}Cs$  NMR spectra of  $K_{0.53}Cs_{2.47}C_{60}$  is shown in Fig. S24 (left). Both O- and T-peaks initially move at the same rate towards smaller  $^{133}Cs$  shift values with decreasing

temperature – the T-peak shifts from  $-102$  to  $-174$  ppm, while the O-peak from  $-349$  to  $-429$  ppm between room temperature and 180 K. The O-T splitting remains essentially unchanged from 247 ppm at room temperature to 255 ppm at 180 K. However, on further cooling between  $T$  and  $T_c$ , the O- and T-peaks behave differently in analogy with our earlier work on the  $\text{Rb}_x\text{Cs}_{3-x}\text{C}_{60}$  family. In  $\text{K}_{0.53}\text{Cs}_{2.47}\text{C}_{60}$ , the O-peak remains almost at the same shift between these two temperatures with  $^{133}\text{Cs}$  shift changing from  $-429$  to  $-465$  ppm. On the other hand, the T-peak continues to strongly vary from  $-174$  ppm at 180 K to  $-353$  K at  $T_c$ . The different temperature dependence of the O- and T-peaks is even more pronounced below  $T_c$  whence the frequency of the T-peak decreases with decreasing temperature, while that of the O-peak increases (dashed lines in Fig. S24 (left)). Such a conflicting temperature dependence of the O- and T-peaks in the metallic state may originate from the different temperature-dependent contributions to the alkali-metal chemical shift given by the ring currents on the neighbouring  $\text{C}_{60}^{3-}$  ions responsible for the extra magnetic field at the two alkali sites [5]. In the overexpanded fullerides studied here, the  $\text{C}_{60}^{3-}$  dynamics are frozen and the alkali metals make close contacts with the surrounding  $\text{C}_{60}$  units – thus, ring-current effects are even more pronounced, leading to additional fields, which shift the tightly packed T-sites by an additional  $\sim 150$  ppm.

A direct consequence of the different temperature dependences of the O- and T-peaks below  $T$  is that these peaks start to overlap considerably (Fig. S24 (left)). Approaching  $T_c$  from above, it is spectrally almost impossible to separate the O- and T-peaks. This makes the analysis of  $^{133}\text{Cs}$  spin-lattice relaxation rates,  $1/T_1$ , more complicated, as the two contributions are entangled. In order to address this difficulty, we first analyzed the  $^{133}\text{Cs}$  magnetization recovery curves at different resonance frequencies for each temperature assuming single-exponential decay. This gives us a plot of an effective  $1/T_1$  value as a function of temperature and shift (Fig. S24 (middle)). Above  $T$  where the O- and T-peaks can be easily separated,  $1/T_1 T$  for the T-site reduces from  $0.051 \text{ s}^{-1}\text{K}^{-1}$  at room temperature to  $0.0462 \text{ s}^{-1}\text{K}^{-1}$  at 180 K. Between the same two temperatures,  $1/T_1 T$  for the O-site changes from  $0.0081$  to  $0.0078 \text{ s}^{-1}\text{K}^{-1}$ . The ratio of  $T_1$  values for the T- and O-site thus remains almost the same (6.3 and 5.9 at room temperature and 180 K, respectively). The ratio also remains around 6 below  $T$  – specifically for  $T = 32$  K we find  $1/T_1 T = 0.029$  and  $0.0047 \text{ s}^{-1}\text{K}^{-1}$  for the T- and O-sites, respectively, yielding a relaxation rate ratio of 6.1. Therefore, in the final step of two-component  $^{133}\text{Cs}$  magnetization recovery analysis, we fixed the ratio between the  $1/T_1 T$  values for the T- and O-sites to 6, yielding the temperature dependences shown in Fig. 6 and S24 (right).

## References

- [1] F. Sayetat, P. Fertey, M. Kessler, *J. Appl. Crystallogr.*, 1998, **31**, 121-127.
- [2] F. D. Murnaghan, *Am. J. Math.* 1937, **59**, 235-260.

- [3] R. E. Walstedt, D. W. Murphy and M. J. Rosseinsky, *Nature*, 1993, **362**, 611-613.
- [4] A. Potocnik, A. Y. Ganin, Y. Takabayashi, M. T. McDonald, I. Heinmaa, P. Jeglic, R. Stern, M. J. Rosseinsky, K. Prassides and D. Arcon, *Chem. Sci.*, 2014, **5**, 3008–3017.
- [5] A. Pasquarello, M. Schluter and R. C. Haddon, *Science*, 1992, **257**, 1660-1661.
- [6] R. H. Zadik, Y. Takabayashi, G. Klupp, R. H. Colman, A. Y. Ganin, A. Potocnik, P. Jeglic, D. Arcon, P. Matus, K. Kamaras, Y. Kasahara, Y. Iwasa, A. N. Fitch, Y. Ohishi, G. Garbarino, K. Kato, M. J. Rosseinsky and K. Prassides, *Sci. Adv.*, 2015, **1**, e1500059.
- [7] A. Y. Ganin, Y. Takabayashi, P. Jeglič, D. Arčon, A. Potočnik, P. J. Baker, Y. Ohishi, M. T. McDonald, M. D. Tzirakis, A. McLennan, G. R. Darling, M. Takata, M. J. Rosseinsky and K. Prassides, *Nature*, 2010, **466**, 221–227.

**Table S1** Nominal,  $x$ , and refined,  $x_K$ , K-content, composition of the phase assemblage and ambient temperature  $fcc$  lattice parameters across the series of  $K_xCs_{3-x}C_{60}$  fullerides studied in the present work.

| $x$  | $x_K$    | $fcc$ phase (%) | $bco$ phase (%) | $CsC_{60}$ phase (%) | $a_{fcc}$ (Å) |
|------|----------|-----------------|-----------------|----------------------|---------------|
| 0.12 | 0.22(1)  | 31.5(2)         | 52.69(7)        | 14.9(2)              | 14.7011(2)    |
| 0.25 | 0.35(1)  | 53.0(2)         | 40.9(2)         | 5.7(3)               | 14.6736(2)    |
| 0.35 | 0.53(1)  | 54.0(2)         | 29.9(2)         | 16.1(3)              | 14.6262(5)    |
| 0.5  | 0.64(1)  | 71.21(7)        | 19.4(2)         | 9.2(3)               | 14.6061(2)    |
| 0.75 | 0.87(1)  | 85.18(7)        | 14.8(1)         | –                    | 14.5576(2)    |
| 1    | 1.28(1)  | 83.34(4)        | 16.69(9)        | –                    | 14.4611(1)    |
| 1.5  | 1.626(4) | 94.05(1)        | 5.97(7)         | –                    | 14.37345(8)   |
| 2    | 1.996(6) | 100             | –               | –                    | 14.28571(7)   |

**Table S2.** Refined parameters for the fcc  $K_2CsC_{60}$  phase (space group  $Fm\bar{3}m$ ) obtained from the Rietveld analysis of the synchrotron X-ray powder diffraction data collected at 300 K ( $\lambda = 0.35419$  Å). Estimated errors in the last digits are given in parentheses. The weighted-profile and expected R-factors are  $R_{wp} = 3.76\%$  and  $R_{exp} = 2.74\%$ . The lattice constant and unit cell volume are:  $a = 14.28571(7)$  Å and  $V = 2915.45(4)$  Å<sup>3</sup>. The tetrahedral and octahedral cavities were occupied by K and Cs, respectively; the sum of the fractional occupancies of the K and Cs atoms was constrained to 2. This resulted in a refined stoichiometry of the fcc-phase of  $K_{1.996(6)}Cs_{1.002(6)}C_{60}$ . The C–C bond lengths of the  $C_{60}$  units were kept fixed at 1.42 Å.

| $T = 300$ K | $x/a$    | $y/b$    | $z/c$    | $M$ | $N$      | $B_{iso}$ (Å <sup>2</sup> ) |
|-------------|----------|----------|----------|-----|----------|-----------------------------|
| K           | 0.25     | 0.25     | 0.25     | 8   | 0.998(3) | 2.05(2)                     |
| Cs          | 0.5      | 0.5      | 0.5      | 4   | 1.002(3) | 3.96(2)                     |
| C(1)        | 0        | 0.049763 | 0.241348 | 96  | 0.5      | 1.01(2)                     |
| C(2)        | 0.210662 | 0.080449 | 0.099325 | 192 | 0.5      | 1.01(2)                     |
| C(3)        | 0.179774 | 0.160797 | 0.049763 | 192 | 0.5      | 1.01(2)                     |

**Table S3** Refined parameters for the fcc  $K_xCs_{3-x}C_{60}$  phase (nominal  $x = 1.5$ , space group  $Fm\bar{3}m$ , phase fraction refined to 94.05(1)%) obtained from the Rietveld analysis of the synchrotron X-ray powder diffraction data collected at 300 K ( $\lambda = 0.39996$  Å). Estimated errors in the last digits are given in parentheses. The weighted-profile and expected R-factors are  $R_{wp} = 4.55\%$  and  $R_{exp} = 3.41\%$ . The lattice constant and unit cell volume are:  $a = 14.37345(8)$  Å and  $V = 2969.50(5)$  Å<sup>3</sup>. The sum of the fractional occupancies of the K and Cs(1) atoms residing in the tetrahedral holes was constrained to 1; the fractional occupancy of the Cs(2) atom residing in the octahedral hole was fixed to 1. This resulted in a refined stoichiometry of the fcc-phase of  $K_{1.626(4)}Cs_{1.374(4)}C_{60}$ . The C–C bond lengths of the  $C_{60}$  units were kept fixed at 1.42 Å. The fraction of the co-existing body-centred-orthorhombic (space group  $Immm$ ) phase is 5.97(7)%.

| $T = 300$ K | $x/a$    | $y/b$    | $z/c$    | $M$ | $N$      | $B_{iso}$ (Å <sup>2</sup> ) |
|-------------|----------|----------|----------|-----|----------|-----------------------------|
| K           | 0.25     | 0.25     | 0.25     | 8   | 0.813(2) | 1.83(2)                     |
| Cs(1)       | 0.25     | 0.25     | 0.25     | 8   | 0.187(2) | 1.83(2)                     |
| Cs(2)       | 0.5      | 0.5      | 0.5      | 4   | 1.0      | 5.14(2)                     |
| C(1)        | 0        | 0.049460 | 0.239874 | 96  | 0.5      | 0.66(2)                     |
| C(2)        | 0.209376 | 0.079958 | 0.098719 | 192 | 0.5      | 0.66(2)                     |
| C(3)        | 0.178677 | 0.159816 | 0.049460 | 192 | 0.5      | 0.66(2)                     |



**Table S4** Refined parameters for the fcc  $K_xCs_{3-x}C_{60}$  phase (nominal  $x = 1$ , space group  $Fm\bar{3}m$ , phase fraction refined to 83.34(4)%) obtained from the Rietveld analysis of the synchrotron X-ray powder diffraction data collected at 112 K ( $\lambda = 0.81887 \text{ \AA}$ ) and 300 K ( $\lambda = 0.35419 \text{ \AA}$ ). Estimated errors in the last digits are given in parentheses. The weighted-profile and expected R-factors are  $R_{wp} = 3.88\%$  and  $R_{exp} = 2.82\%$  (300 K) and  $R_{wp} = 3.91\%$  and  $R_{exp} = 2.36\%$  (112 K). The lattice constants and unit cell volumes are:  $a = 14.4611(1) \text{ \AA}$  and  $V = 3024.13(7) \text{ \AA}^3$  at 300 K and  $a = 14.4006(1) \text{ \AA}$  and  $V = 2986.37(7) \text{ \AA}^3$  at 112 K. The sum of the fractional occupancies of the K and Cs(1) atoms residing in the tetrahedral holes was constrained to 1; the fractional occupancy of the Cs(2) atom residing in the octahedral hole was fixed to 1. This resulted in a refined stoichiometry of the fcc-phase of  $K_{1.28(1)}Cs_{1.72(1)}C_{60}$ , which was kept fixed in subsequent refinements at higher temperatures. The C–C bond lengths of the  $C_{60}$  units were kept fixed at  $1.42 \text{ \AA}$ . The fraction of the co-existing body-centred-orthorhombic (space group  $Immm$ ) phase is 16.69(9)%.

| $T = 112 \text{ K}$ | $x/a$    | $y/b$    | $z/c$    | $M$ | $N$      | $B_{iso} (\text{\AA}^2)$ |
|---------------------|----------|----------|----------|-----|----------|--------------------------|
| K                   | 0.25     | 0.25     | 0.25     | 8   | 0.641(3) | 0.26(1)                  |
| Cs(1)               | 0.25     | 0.25     | 0.25     | 8   | 0.359(3) | 0.26(1)                  |
| Cs(2)               | 0.5      | 0.5      | 0.5      | 4   | 1.0      | 1.89(1)                  |
| C(1)                | 0        | 0.049366 | 0.239422 | 96  | 0.5      | 0.18(2)                  |
| C(2)                | 0.208981 | 0.079807 | 0.098533 | 192 | 0.5      | 0.18(2)                  |
| C(3)                | 0.178340 | 0.159515 | 0.049366 | 192 | 0.5      | 0.18(2)                  |
| $T = 300 \text{ K}$ | $x/a$    | $y/b$    | $z/c$    | $M$ | $N$      | $B_{iso} (\text{\AA}^2)$ |
| K                   | 0.25     | 0.25     | 0.25     | 8   | 0.641    | 1.17(1)                  |
| Cs(1)               | 0.25     | 0.25     | 0.25     | 8   | 0.359    | 1.17(1)                  |
| Cs(2)               | 0.5      | 0.5      | 0.5      | 4   | 1.0      | 4.12(2)                  |
| C(1)                | 0        | 0.049159 | 0.238416 | 96  | 0.5      | 0.78(2)                  |
| C(2)                | 0.208103 | 0.079472 | 0.098118 | 192 | 0.5      | 0.78(2)                  |
| C(3)                | 0.177590 | 0.158844 | 0.049159 | 192 | 0.5      | 0.78(2)                  |

**Table S5** Refined parameters for the fcc  $K_xCs_{3-x}C_{60}$  phase (nominal  $x = 0.75$ , space group  $Fm\bar{3}m$ , phase fraction refined to 85.18(7)%) obtained from the Rietveld analysis of the synchrotron X-ray powder diffraction data collected at 10 and 300 K ( $\lambda = 0.39984$  Å). Estimated errors in the last digits are given in parentheses. The weighted-profile and expected R-factors are  $R_{wp} = 3.55\%$  and  $R_{exp} = 2.60\%$  (300 K) and  $R_{wp} = 3.62\%$  and  $R_{exp} = 2.89\%$  (10 K). The lattice constants and unit cell volumes are:  $a = 14.5576(2)$  Å and  $V = 3085.1(1)$  Å<sup>3</sup> at 300 K and  $a = 14.4584(1)$  Å and  $V = 3022.46(6)$  Å<sup>3</sup> at 10 K. The sum of the fractional occupancies of the K and Cs(1) atoms residing in the tetrahedral holes was constrained to 1; the fractional occupancy of the Cs(2) atom residing in the octahedral hole was fixed to 1. This resulted in a refined stoichiometry of the fcc-phase of  $K_{0.87(1)}Cs_{2.13(1)}C_{60}$ , which was kept fixed in subsequent refinements at higher temperatures. The C–C bond lengths of the  $C_{60}$  units were kept fixed at 1.42 Å. The fraction of the co-existing body-centred-orthorhombic (space group  $Immm$ ) phase is 14.8(1)%.

| $T = 10$ K  | $x/a$    | $y/b$    | $z/c$    | $M$ | $N$      | $B_{iso}$ (Å <sup>2</sup> ) |
|-------------|----------|----------|----------|-----|----------|-----------------------------|
| K           | 0.25     | 0.25     | 0.25     | 8   | 0.435(6) | 0.59(1)                     |
| Cs(1)       | 0.5      | 0.5      | 0.5      | 4   | 0.565(6) | 0.59(1)                     |
| Cs(2)       | 0.5      | 0.5      | 0.5      | 4   | 1.0      | 1.11(1)                     |
| C(1)        | 0        | 0.045305 | 0.241300 | 96  | 0.5      | 0.33(2)                     |
| C(2)        | 0.209783 | 0.082731 | 0.094550 | 192 | 0.5      | 0.33(2)                     |
| C(3)        | 0.181221 | 0.157584 | 0.050230 | 192 | 0.5      | 0.33(2)                     |
| $T = 300$ K | $x/a$    | $y/b$    | $z/c$    | $M$ | $N$      | $B_{iso}$ (Å <sup>2</sup> ) |
| K           | 0.25     | 0.25     | 0.25     | 8   | 0.435    | 1.09(3)                     |
| Cs(1)       | 0.25     | 0.25     | 0.25     | 8   | 0.565    | 1.09(3)                     |
| Cs(2)       | 0.5      | 0.5      | 0.5      | 4   | 1.0      | 4.59(5)                     |
| C(1)        | 0        | 0.048834 | 0.236840 | 96  | 0.5      | 0.57(5)                     |
| C(2)        | 0.206727 | 0.078947 | 0.097470 | 192 | 0.5      | 0.57(5)                     |
| C(3)        | 0.176417 | 0.157794 | 0.048834 | 192 | 0.5      | 0.57(5)                     |

**Table S6** Refined parameters for the fcc  $K_xCs_{3-x}C_{60}$  phase (nominal  $x = 0.5$ , space group  $Fm\bar{3}m$ , phase fraction refined to 71.21(7)%) obtained from the Rietveld analysis of the synchrotron X-ray powder diffraction data collected at 10 and 300 K ( $\lambda = 0.39984 \text{ \AA}$ ). Estimated errors in the last digits are given in parentheses. The weighted-profile and expected R-factors are  $R_{wp} = 3.04\%$  and  $R_{exp} = 2.21\%$  (300 K) and  $R_{wp} = 3.38\%$  and  $R_{exp} = 2.54\%$  (10 K). The lattice constants and unit cell volumes are:  $a = 14.6061(2) \text{ \AA}$  and  $V = 3116.0(1) \text{ \AA}^3$  at 300 K and  $a = 14.5040(1) \text{ \AA}$  and  $V = 3051.15(6) \text{ \AA}^3$  at 10 K. The sum of the fractional occupancies of the K and Cs(1) atoms residing in the tetrahedral holes was constrained to 1; the fractional occupancy of the Cs(2) atom residing in the octahedral hole was fixed to 1. This resulted in a refined stoichiometry of the fcc-phase of  $K_{0.64(1)}Cs_{2.36(1)}C_{60}$ , which was kept fixed in subsequent refinements at higher temperatures. The C–C bond lengths of the  $C_{60}$  units were kept fixed at  $1.42 \text{ \AA}$ . The fractions of the co-existing body-centred-orthorhombic (space group  $Immm$ ) and  $CsC_{60}$  phases are 19.4(2)% and 9.2(3)%, respectively.

| $T = 10 \text{ K}$  | $x/a$    | $y/b$    | $z/c$    | $M$ | $N$      | $B_{iso} (\text{\AA}^2)$ |
|---------------------|----------|----------|----------|-----|----------|--------------------------|
| K                   | 0.25     | 0.25     | 0.25     | 8   | 0.319(5) | 0.40(1)                  |
| Cs(1)               | 0.25     | 0.25     | 0.25     | 8   | 0.681(5) | 0.40(1)                  |
| Cs(2)               | 0.5      | 0.5      | 0.5      | 4   | 1.0      | 0.84(1)                  |
| C(1)                | 0        | 0.049014 | 0.237715 | 96  | 0.5      | 0.22(2)                  |
| C(2)                | 0.207491 | 0.079238 | 0.097830 | 192 | 0.5      | 0.22(2)                  |
| C(3)                | 0.177068 | 0.158377 | 0.049014 | 192 | 0.5      | 0.22(2)                  |
| $T = 300 \text{ K}$ | $x/a$    | $y/b$    | $z/c$    | $M$ | $N$      | $B_{iso} (\text{\AA}^2)$ |
| K                   | 0.25     | 0.25     | 0.25     | 8   | 0.319    | 2.02(3)                  |
| Cs(1)               | 0.25     | 0.25     | 0.25     | 8   | 0.681    | 2.02(3)                  |
| Cs(2)               | 0.5      | 0.5      | 0.5      | 4   | 1.0      | 8.47(4)                  |
| C(1)                | 0        | 0.04867  | 0.23605  | 96  | 0.5      | 0.92(4)                  |
| C(2)                | 0.20604  | 0.07869  | 0.09715  | 192 | 0.5      | 0.92(4)                  |
| C(3)                | 0.17583  | 0.15727  | 0.04867  | 192 | 0.5      | 0.92(4)                  |

**Table S7** Refined parameters for the fcc  $K_xCs_{3-x}C_{60}$  phase (nominal  $x = 0.35$ , space group  $Fm\bar{3}m$ , phase fraction refined to 54.0(2)%) obtained from the Rietveld analysis of the synchrotron X-ray powder diffraction data collected at 300 K ( $\lambda = 0.39984$  Å). Estimated errors in the last digits are given in parentheses. The weighted-profile and expected R-factors are  $R_{wp} = 4.11\%$  and  $R_{exp} = 2.96\%$ . The lattice constant and unit cell volume are:  $a = 14.6262(5)$  Å and  $V = 3128.9(3)$  Å<sup>3</sup>. The sum of the fractional occupancies of the K and Cs(1) atoms residing in the tetrahedral holes was constrained to 1; the fractional occupancy of the Cs(2) atom residing in the octahedral hole was fixed to 1. This resulted in a refined stoichiometry of the fcc-phase of  $K_{0.53(1)}Cs_{2.47(1)}C_{60}$ . The C–C bond lengths of the  $C_{60}$  units were kept fixed at 1.42 Å. The fractions of the co-existing body-centred-orthorhombic (space group  $Immm$ ) and  $CsC_{60}$  phases are 29.9(2)% and 16.1(3)%, respectively.

| $T = 300$ K | $x/a$    | $y/b$    | $z/c$    | $M$ | $N$      | $B_{iso}$ (Å <sup>2</sup> ) |
|-------------|----------|----------|----------|-----|----------|-----------------------------|
| K           | 0.25     | 0.25     | 0.25     | 8   | 0.263(6) | 1.17(3)                     |
| Cs(1)       | 0.25     | 0.25     | 0.25     | 8   | 0.737(6) | 1.17(3)                     |
| Cs(2)       | 0.5      | 0.5      | 0.5      | 4   | 1.0      | 5.60(4)                     |
| C(1)        | 0        | 0.048605 | 0.235729 | 96  | 0.5      | 0.71(4)                     |
| C(2)        | 0.205758 | 0.078576 | 0.097013 | 192 | 0.5      | 0.71(4)                     |
| C(3)        | 0.175589 | 0.157054 | 0.048605 | 192 | 0.5      | 0.71(4)                     |

**Table S8** Refined parameters for the fcc  $K_xCs_{3-x}C_{60}$  phase (nominal  $x = 0.25$ , space group  $Fm\bar{3}m$ , phase fraction refined to 53.0(2)%) obtained from the Rietveld analysis of the synchrotron X-ray powder diffraction data collected at 40 and 300 K ( $\lambda = 0.39999$  Å). Estimated errors in the last digits are given in parentheses. The weighted-profile and expected R-factors are  $R_{wp} = 5.34\%$  and  $R_{exp} = 4.47\%$  (300 K) and  $R_{wp} = 5.41\%$  and  $R_{exp} = 3.52\%$  (40 K). The lattice constants and unit cell volumes are:  $a = 14.6736(2)$  Å and  $V = 3159.4(1)$  Å<sup>3</sup> at 300 K and  $a = 14.5762(3)$  Å and  $V = 3096.9(2)$  Å<sup>3</sup> at 40 K. The sum of the fractional occupancies of the K and Cs(1) atoms residing in the tetrahedral holes was constrained to 1; the fractional occupancy of the Cs(2) atom residing in the octahedral hole was fixed to 1. This resulted in a refined stoichiometry of the fcc-phase of  $K_{0.35(1)}Cs_{2.65(1)}C_{60}$ , which was kept fixed in subsequent refinements at higher temperatures. The C–C bond lengths of the  $C_{60}$  units were kept fixed at 1.42 Å. The fractions of the co-existing body-centred-orthorhombic (space group  $Immm$ ) and  $CsC_{60}$  phases are 40.9(2)% and 5.7(3)%, respectively.

| $T = 40$ K  | $x/a$    | $y/b$    | $z/c$    | $M$ | $N$      | $B_{iso}$ (Å <sup>2</sup> ) |
|-------------|----------|----------|----------|-----|----------|-----------------------------|
| K           | 0.25     | 0.25     | 0.25     | 8   | 0.176    | 1.08(3)                     |
| Cs(1)       | 0.25     | 0.25     | 0.25     | 8   | 0.824    | 1.08(3)                     |
| Cs(2)       | 0.5      | 0.5      | 0.5      | 4   | 1.0      | 2.40(5)                     |
| C(1)        | 0        | 0.048772 | 0.236537 | 96  | 0.5      | 0.04(6)                     |
| C(2)        | 0.206463 | 0.078846 | 0.097345 | 192 | 0.5      | 0.04(6)                     |
| C(3)        | 0.176191 | 0.157592 | 0.048772 | 192 | 0.5      | 0.04(6)                     |
| $T = 300$ K | $x/a$    | $y/b$    | $z/c$    | $M$ | $N$      | $B_{iso}$ (Å <sup>2</sup> ) |
| K           | 0.25     | 0.25     | 0.25     | 8   | 0.176(7) | 2.16(3)                     |
| Cs(1)       | 0.25     | 0.25     | 0.25     | 8   | 0.824(7) | 2.16(3)                     |
| Cs(2)       | 0.5      | 0.5      | 0.5      | 4   | 1.0      | 8.61(7)                     |
| C(1)        | 0        | 0.048448 | 0.234968 | 96  | 0.5      | 0.53(6)                     |
| C(2)        | 0.205093 | 0.078323 | 0.096699 | 192 | 0.5      | 0.53(6)                     |
| C(3)        | 0.175022 | 0.156547 | 0.048448 | 192 | 0.5      | 0.53(6)                     |

**Table S9** Refined parameters for the fcc  $K_xCs_{3-x}C_{60}$  phase (nominal  $x = 0.12$ , space group  $Fm\bar{3}m$ , phase fraction refined to 31.5(2)%) obtained from the Rietveld analysis of the synchrotron X-ray powder diffraction data collected at 300 K ( $\lambda = 0.39999$  Å). Estimated errors in the last digits are given in parentheses. The weighted-profile and expected R-factors are  $R_{wp} = 4.90\%$  and  $R_{exp} = 3.40\%$ . The lattice constant and unit cell volume are:  $a = 14.7011(2)$  Å and  $V = 3177.2(1)$  Å<sup>3</sup>. The sum of the fractional occupancies of the K and Cs(1) atoms residing in the tetrahedral holes was constrained to 1; the fractional occupancy of the Cs(2) atom residing in the octahedral hole was fixed to 1. This resulted in a refined stoichiometry of the fcc-phase of  $K_{0.22(1)}Cs_{2.78(1)}C_{60}$ . The C–C bond lengths of the  $C_{60}$  units were kept fixed at 1.42 Å. The fractions of the co-existing body-centred-orthorhombic (space group  $Immm$ ) and  $CsC_{60}$  phases are 52.69(7)% and 14.9(2)%, respectively.

| $T = 300$ K | $x/a$    | $y/b$    | $z/c$    | $M$ | $N$      | $B_{iso}$ (Å <sup>2</sup> ) |
|-------------|----------|----------|----------|-----|----------|-----------------------------|
| K           | 0.25     | 0.25     | 0.25     | 8   | 0.109(6) | 1.28(2)                     |
| Cs(1)       | 0.25     | 0.25     | 0.25     | 8   | 0.891(6) | 1.28(2)                     |
| Cs(2)       | 0.5      | 0.5      | 0.5      | 4   | 1.0      | 5.82(4)                     |
| C(1)        | 0        | 0.048357 | 0.234528 | 96  | 0.5      | 0.29(5)                     |
| C(2)        | 0.204709 | 0.078176 | 0.096518 | 192 | 0.5      | 0.29(5)                     |
| C(3)        | 0.174695 | 0.156254 | 0.048357 | 192 | 0.5      | 0.29(5)                     |

**Table S10** Parameters of the Debye fits to the  $V(T)$  data of the  $K_xCs_{3-x}C_{60}$  fullerides investigated in the present work. The values of  $\Theta_D$  for the samples with  $x_K = 0.35, 0.64,$  and  $0.87$  were fixed at that of  $Cs_3C_{60}$  from ref. [6] while that for  $x_K = 1.28$  was fixed at that of  $Rb_2CsC_{60}$  from ref. [6]

| $x$          | $x_K$        | Fitted $T$ range<br>(K) | $V_0$ ( $\text{\AA}^3$ ) | $\Theta_D$ (K) | $I_V$ ( $\text{\AA}^3 \text{K}^{-1}$ ) |
|--------------|--------------|-------------------------|--------------------------|----------------|----------------------------------------|
| 0            | 0            | 30-295                  | 3161.4(7)                | 218(22)        | 0.246(7)                               |
| 0.25         | 0.35(1)      | 100-300                 | 3106.2(3)                | 218            | 0.239(2)                               |
| 0.5          | 0.64(1)      | 210-300                 | 3063.9(7)                | 218            | 0.231(4)                               |
| 0.75         | 0.87(1)      | 265-300                 | 3031.4(6)                | 218            | 0.238(1)                               |
| 1            | 1.28(1)      | 110-300                 | 2973.8(2)                | 152            | 0.216(2)                               |
| $x_{Rb} = 2$ | $x_{Rb} = 2$ | 10-570                  | 2962.0(3)                | 152(6)         | 0.2293(9)                              |

**Table S11** Refined parameters for the fcc  $K_{1.28}Cs_{2.72}C_{60}$  phase (space group  $Fm\bar{3}m$ , phase fraction refined to 82.739(3)%) obtained from the Rietveld analysis of the synchrotron X-ray powder diffraction data collected at 7 K ( $\lambda = 0.41238$  Å) at 0.3 and 9.8 GPa. Estimated errors in the last digits are given in parentheses. The weighted-profile and expected R-factors are  $R_{wp} = 0.42\%$  and  $R_{exp} = 0.39\%$  (0.3 GPa) and  $R_{wp} = 0.44\%$  and  $R_{exp} = 0.41\%$  (9.8 GPa). The lattice constants and unit cell volumes are:  $a = 14.3491(1)$  Å and  $V = 2954.43(6)$  Å<sup>3</sup> at 0.3 GPa and  $a = 13.5299(3)$  Å and  $V = 2476.8(2)$  Å<sup>3</sup> at 9.8 GPa. The fractional site occupancies of the K and Cs(1) atoms residing in the tetrahedral holes were fixed to values obtained from the analysis of the ambient pressure data (Table S4); the fractional occupancy of the Cs(2) atom residing in the octahedral hole was fixed to 1. The C–C bond lengths of the  $C_{60}$  units were kept fixed at 1.42 Å. The fraction of the co-existing body-centred-orthorhombic (space group  $Immm$ ) phase is 17.26(1)% at 0.3 GPa. The thermal displacement parameters of the C atoms could not refine to physically meaningful values, so they were kept fixed. Those of the metal ions in the tetrahedral and octahedral interstitial sites were only refined at 0.3 GPa and kept fixed to these values at all other pressures.

| $P = 0.3$ GPa | $x/a$   | $y/b$   | $z/c$   | $N$  | $B_{iso}$ (Å <sup>2</sup> ) |
|---------------|---------|---------|---------|------|-----------------------------|
| K             | 0.25    | 0.25    | 0.25    | 0.64 | 0.52(3)                     |
| Cs(1)         | 0.25    | 0.25    | 0.25    | 0.36 | 0.52(3)                     |
| Cs(2)         | 0.5     | 0.5     | 0.5     | 1.0  | 0.93(3)                     |
| C(1)          | 0       | 0.04954 | 0.24028 | 0.5  | 0.13                        |
| C(2)          | 0.20973 | 0.08009 | 0.09889 | 0.5  | 0.13                        |
| C(3)          | 0.17898 | 0.16009 | 0.04954 | 0.5  | 0.13                        |
| $P = 9.8$ GPa | $x/a$   | $y/b$   | $z/c$   | $N$  | $B_{iso}$ (Å <sup>2</sup> ) |
| K             | 0.25    | 0.25    | 0.25    | 0.64 | 0.52                        |
| Cs(1)         | 0.25    | 0.25    | 0.25    | 0.36 | 0.52                        |
| Cs(2)         | 0.5     | 0.5     | 0.5     | 1.0  | 0.93                        |
| C(1)          | 0       | 0.05254 | 0.25483 | 0.5  | 0.13                        |
| C(2)          | 0.22243 | 0.08494 | 0.10487 | 0.5  | 0.13                        |
| C(3)          | 0.18981 | 0.16978 | 0.05254 | 0.5  | 0.13                        |



**Table S12** Refined parameters for the fcc  $\text{K}_{0.87}\text{Cs}_{2.13}\text{C}_{60}$  phase (space group  $Fm\bar{3}m$ , phase fraction refined to 84.02(5)%) obtained from the Rietveld analysis of the synchrotron X-ray powder diffraction data collected at 7 K ( $\lambda = 0.41238 \text{ \AA}$ ) at 0.3 and 9.8 GPa. Estimated errors in the last digits are given in parentheses. The weighted-profile and expected R-factors are  $R_{\text{wp}} = 0.56\%$  and  $R_{\text{exp}} = 0.39\%$  (0.3 GPa) and  $R_{\text{wp}} = 0.67\%$  and  $R_{\text{exp}} = 0.38\%$  (9.8 GPa). The lattice constants and unit cell volumes are:  $a = 14.4468(1) \text{ \AA}$  and  $V = 3015.19(6) \text{ \AA}^3$  at 0.3 GPa and  $a = 13.5821(3) \text{ \AA}$  and  $V = 2505.5(2) \text{ \AA}^3$  at 9.8 GPa. The fractional site occupancies of the K and Cs(1) atoms residing in the tetrahedral holes were fixed to values obtained from the analysis of the ambient pressure data (Table S5); the fractional occupancy of the Cs(2) atom residing in the octahedral hole was fixed to 1. The C–C bond lengths of the  $\text{C}_{60}$  units were kept fixed at 1.42  $\text{\AA}$ . The fraction of the co-existing body-centred-orthorhombic (space group  $Immm$ ) phase is 16.3(2)% at 0.3 GPa. The thermal displacement parameters of the atoms were only refined at 0.3 GPa and kept fixed to those values at all other pressures.

| $P = 0.3 \text{ GPa}$ | $x/a$   | $y/b$   | $z/c$   | $N$   | $B_{\text{iso}} (\text{\AA}^2)$ |
|-----------------------|---------|---------|---------|-------|---------------------------------|
| K                     | 0.25    | 0.25    | 0.25    | 0.435 | 0.92(3)                         |
| Cs(1)                 | 0.25    | 0.25    | 0.25    | 0.565 | 0.92(3)                         |
| Cs(2)                 | 0.5     | 0.5     | 0.5     | 1.0   | 1.42(4)                         |
| C(1)                  | 0       | 0.04921 | 0.23866 | 0.5   | 0.44(4)                         |
| C(2)                  | 0.20831 | 0.07955 | 0.09822 | 0.5   | 0.44(4)                         |
| C(3)                  | 0.17777 | 0.15900 | 0.04920 | 0.5   | 0.44(4)                         |
| $P = 9.8 \text{ GPa}$ | $x/a$   | $y/b$   | $z/c$   | $N$   | $B_{\text{iso}} (\text{\AA}^2)$ |
| K                     | 0.25    | 0.25    | 0.25    | 0.435 | 0.92                            |
| Cs(1)                 | 0.25    | 0.25    | 0.25    | 0.565 | 0.92                            |
| Cs(2)                 | 0.5     | 0.5     | 0.5     | 1.0   | 1.42                            |
| C(1)                  | 0       | 0.05234 | 0.25385 | 0.5   | 0.44                            |
| C(2)                  | 0.22158 | 0.08462 | 0.10448 | 0.5   | 0.44                            |
| C(3)                  | 0.18909 | 0.16913 | 0.05234 | 0.5   | 0.44                            |

**Table S13** Refined parameters for the fcc  $\text{K}_{0.35}\text{Cs}_{2.65}\text{C}_{60}$  phase (space group  $Fm\bar{3}m$ , phase fraction refined to 54.3(1)%) obtained from the Rietveld analysis of the synchrotron X-ray powder diffraction data collected at 7 K ( $\lambda = 0.41260 \text{ \AA}$ ) at 0.6 and 10.2 GPa. Estimated errors in the last digits are given in parentheses. The weighted-profile and expected R-factors are  $R_{\text{wp}} = 0.45\%$  and  $R_{\text{exp}} = 0.45\%$  (0.6 GPa) and  $R_{\text{wp}} = 0.92\%$  and  $R_{\text{exp}} = 0.45\%$  (10.2 GPa). The lattice constants and unit cell volumes are:  $a = 14.4742(4) \text{ \AA}$  and  $V = 3032.4(3) \text{ \AA}^3$  at 0.6 GPa and  $a = 13.569(2) \text{ \AA}$  and  $V = 2498(1) \text{ \AA}^3$  at 10.2 GPa. The fractional site occupancies of the K and Cs(1) atoms residing in the tetrahedral holes were fixed to values obtained from the analysis of the ambient pressure data (Table S8); the fractional occupancy of the Cs(2) atom residing in the octahedral hole was fixed to 1. The C–C bond lengths of the  $\text{C}_{60}$  units were kept fixed at 1.42  $\text{ \AA}$ . The fractions of the co-existing body-centred-orthorhombic (space group  $Immm$ ) and  $\text{CsC}_{60}$  phases are 35.0(2)% and 10.7(4)%, respectively (0.3 GPa). Thermal displacement parameters of the tetrahedral holes and C atoms were fixed to values refined from the ambient pressure data for the same sample as, with the data quality available, these could not be meaningfully refined together with the profile shape parameters necessary to describe the pressure-induced peak broadening.

| $P = 0.6 \text{ GPa}$  | $x/a$    | $y/b$    | $z/c$    | $N$   | $B_{\text{iso}} (\text{\AA}^2)$ |
|------------------------|----------|----------|----------|-------|---------------------------------|
| K                      | 0.25     | 0.25     | 0.25     | 0.435 | 1.08                            |
| Cs(1)                  | 0.25     | 0.25     | 0.25     | 0.565 | 1.08                            |
| Cs(2)                  | 0.5      | 0.5      | 0.5      | 1.0   | 2.84(2)                         |
| C(1)                   | 0        | 0.049115 | 0.238205 | 0.5   | 0.04                            |
| C(2)                   | 0.207919 | 0.079402 | 0.098032 | 0.5   | 0.04                            |
| C(3)                   | 0.177433 | 0.158703 | 0.049115 | 0.5   | 0.04                            |
| $P = 10.2 \text{ GPa}$ | $x/a$    | $y/b$    | $z/c$    | $N$   | $B_{\text{iso}} (\text{\AA}^2)$ |
| K                      | 0.25     | 0.25     | 0.25     | 0.435 | 1.08                            |
| Cs(1)                  | 0.25     | 0.25     | 0.25     | 0.565 | 1.08                            |
| Cs(2)                  | 0.5      | 0.5      | 0.5      | 1.0   | 2.84(2)                         |
| C(1)                   | 0        | 0.052393 | 0.254103 | 0.5   | 0.04                            |
| C(2)                   | 0.221795 | 0.084701 | 0.104574 | 0.5   | 0.04                            |
| C(3)                   | 0.189275 | 0.169296 | 0.052393 | 0.5   | 0.04                            |

**Table S14** Parameters derived from the second-order Murnaghan equation-of-state fits to the 7 K  $V(P)$  data of the  $K_x\text{Cs}_{3-x}\text{C}_{60}$  fullerides with  $x_K = 0.35, 0.87,$  and  $1.28$  investigated in the present work. The low-temperature literature data for fcc  $\text{Cs}_3\text{C}_{60}$  [7] and  $\text{Rb}_2\text{CsC}_{60}$  [6] are also included for comparison.

| $x_K$               | $K_0$ (GPa) | $K'_0 (= dK_0/dP)_{P=0}$ | $\kappa (= d\ln V/dP)$ (GPa $^{-1}$ ) | $V_0$ (Å $^3$ ) |
|---------------------|-------------|--------------------------|---------------------------------------|-----------------|
| 0                   | 13.7(3)     | 13.0(3)                  | 0.073(2)                              | 3163.6          |
| 0.35                | 19.0(1)     | 9.0(1)                   | 0.0526(3)                             | 3120(1)         |
| 0.87                | 17.9(2)     | 8.94(9)                  | 0.0559(6)                             | 3057(1)         |
| 1.28                | 18.7(6)     | 8.6(2)                   | 0.053(2)                              | 3008(3)         |
| $x_{\text{Rb}} = 2$ | 20.9(3)     | 8.8(2)                   | 0.0479(7)                             | 2961.9          |

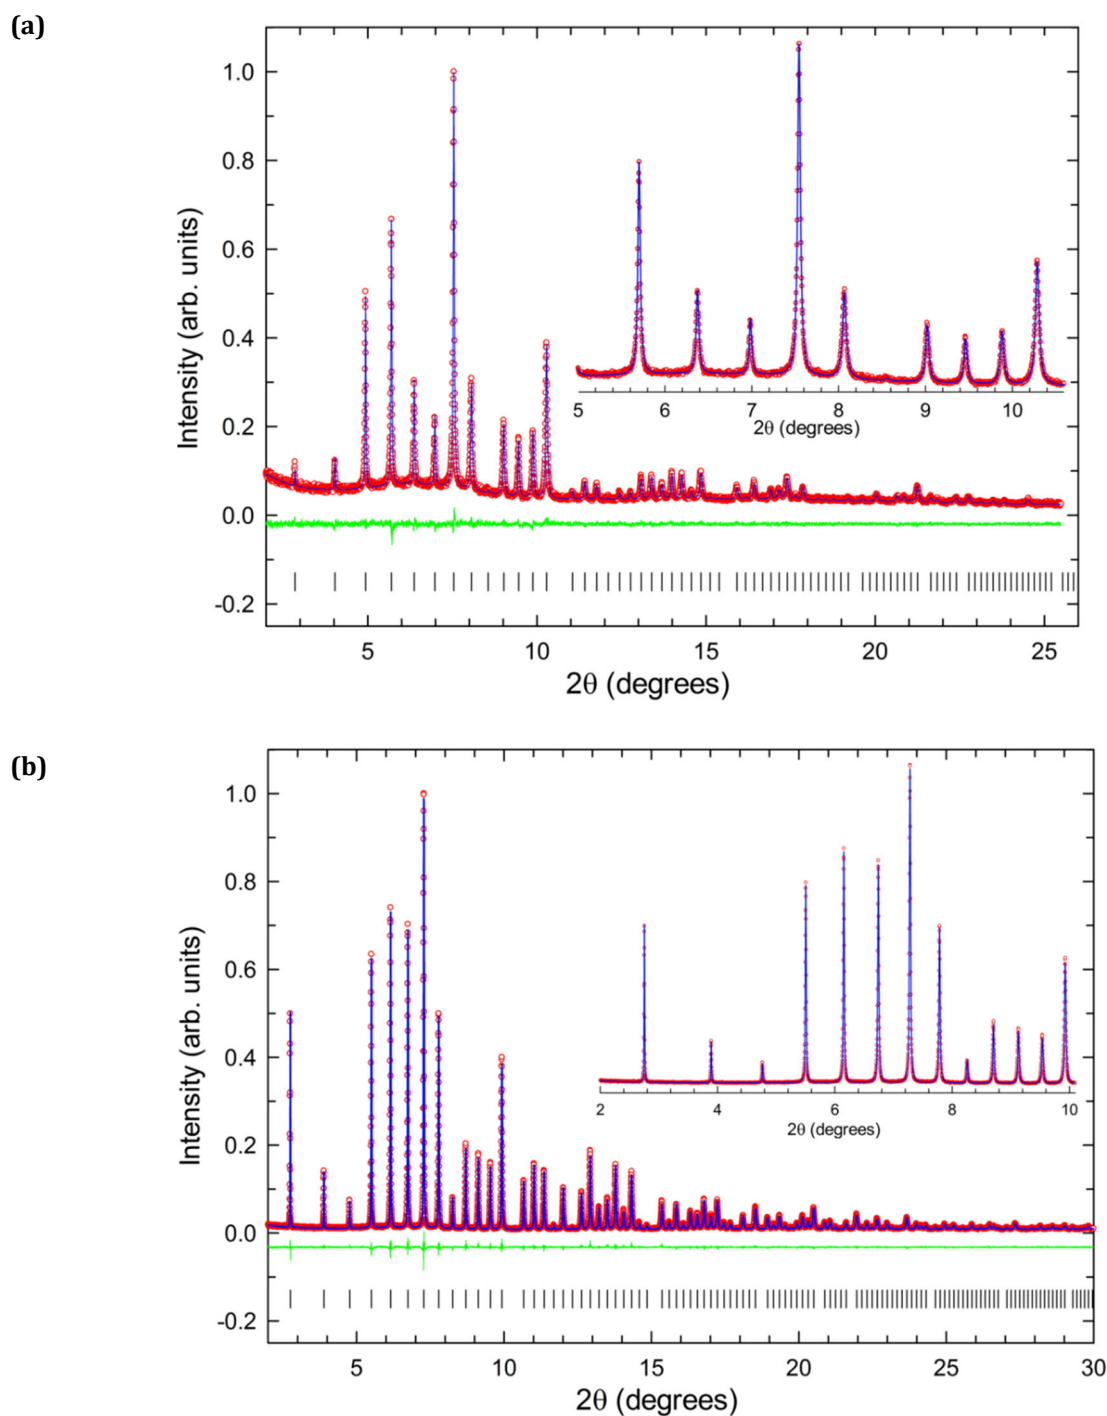

**Fig. S1** Rietveld fits to SXRPD data collected at ambient temperature for phase-pure (a)  $K_6C_{60}$  ( $a = 11.3775(2) \text{ \AA}$ ) and (b)  $Cs_6C_{60}$  ( $a = 11.7887(2) \text{ \AA}$ ) ( $\lambda = 0.40006 \text{ \AA}$ , step size =  $0.002^\circ$ ). Red circles, blue line and green line represent the observed, calculated and difference profiles, respectively. Black ticks mark the reflection positions of  $K_6C_{60}$  and  $Cs_6C_{60}$  (space group  $Im\bar{3}$ ). Both insets display expanded regions of the respective diffraction profiles. The weighted-profile and expected  $R$ -factors are  $R_{wp} = 4.43\%$  and  $R_{exp} = 4.18\%$  ( $K_6C_{60}$ ) and  $R_{wp} = 4.43\%$  and  $R_{exp} = 3.58\%$  ( $Cs_6C_{60}$ ).

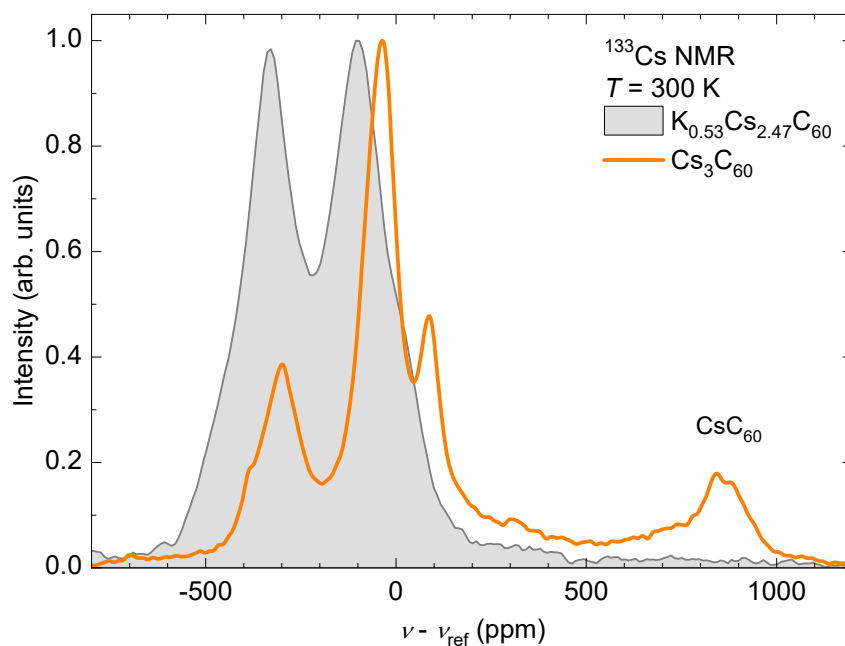

**Fig. S2** Comparison of the  $^{133}\text{Cs}$  NMR spectra measured for  $\text{K}_{0.53}\text{Cs}_{2.47}\text{C}_{60}$  (shaded area) and  $\text{Cs}_3\text{C}_{60}$  (orange line) powders at  $T = 300$  K. Note the presence of the  $\text{CsC}_{60}$  signal shifted by  $\sim 800$  ppm relative to reference in the latter sample. The  $\text{CsC}_{60}$  signal is absent for the  $\text{K}_{0.53}\text{Cs}_{2.47}\text{C}_{60}$  sample.

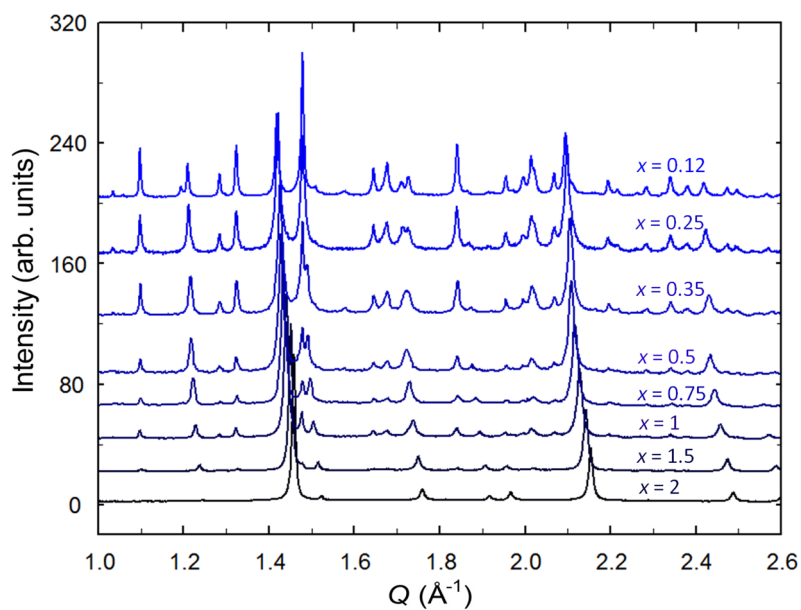

**Fig. S3** High-resolution SXRPD profiles collected at ambient temperature for the series of  $\text{K}_x\text{Cs}_{3-x}\text{C}_{60}$  samples (nominal K content,  $0.12 \leq x \leq 2$ ).

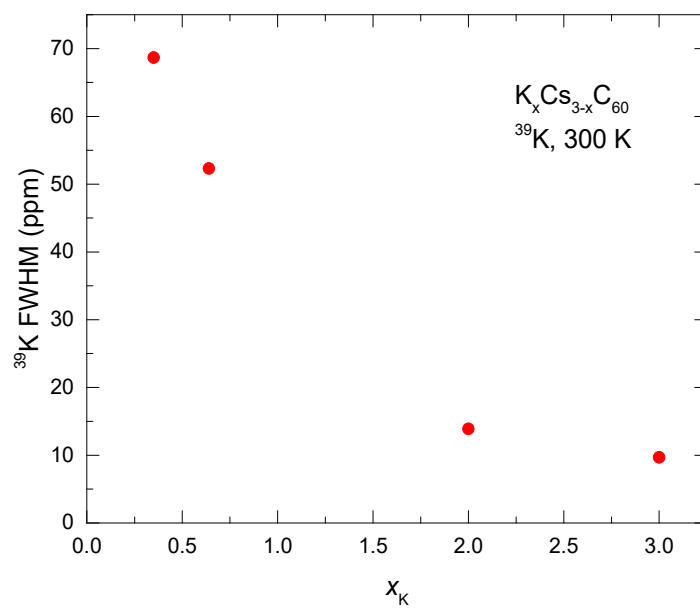

**Fig. S4** Full-width-at-half-maximum of the tetrahedral peaks of the  $^{39}\text{K}$  NMR spectra of  $\text{K}_x\text{Cs}_x\text{C}_{60}$  measured at 300 K and plotted against the refined potassium content,  $x_K$ .

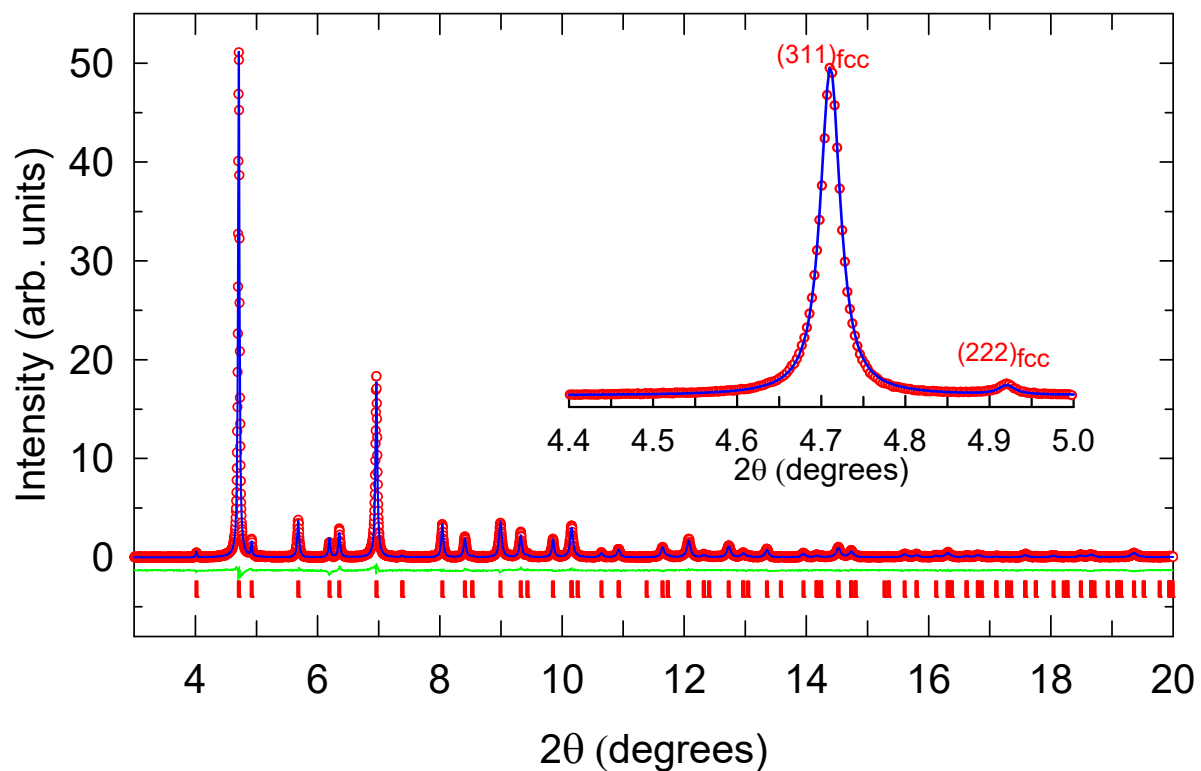

**Fig. S5** Rietveld fit to synchrotron XRPD data collected at 300 K for fcc-structured  $K_2CsC_{60}$  ( $R_{wp} = 3.76\%$ ,  $R_{exp} = 2.74\%$ ,  $\lambda = 0.35419 \text{ \AA}$ ). Red circles, blue lines and green lines represent the observed, calculated and difference profiles. Ticks mark the reflection positions. The inset displays an expanded region of the diffraction profile; observed Bragg peaks are labelled by their  $hkl$  Miller indices.

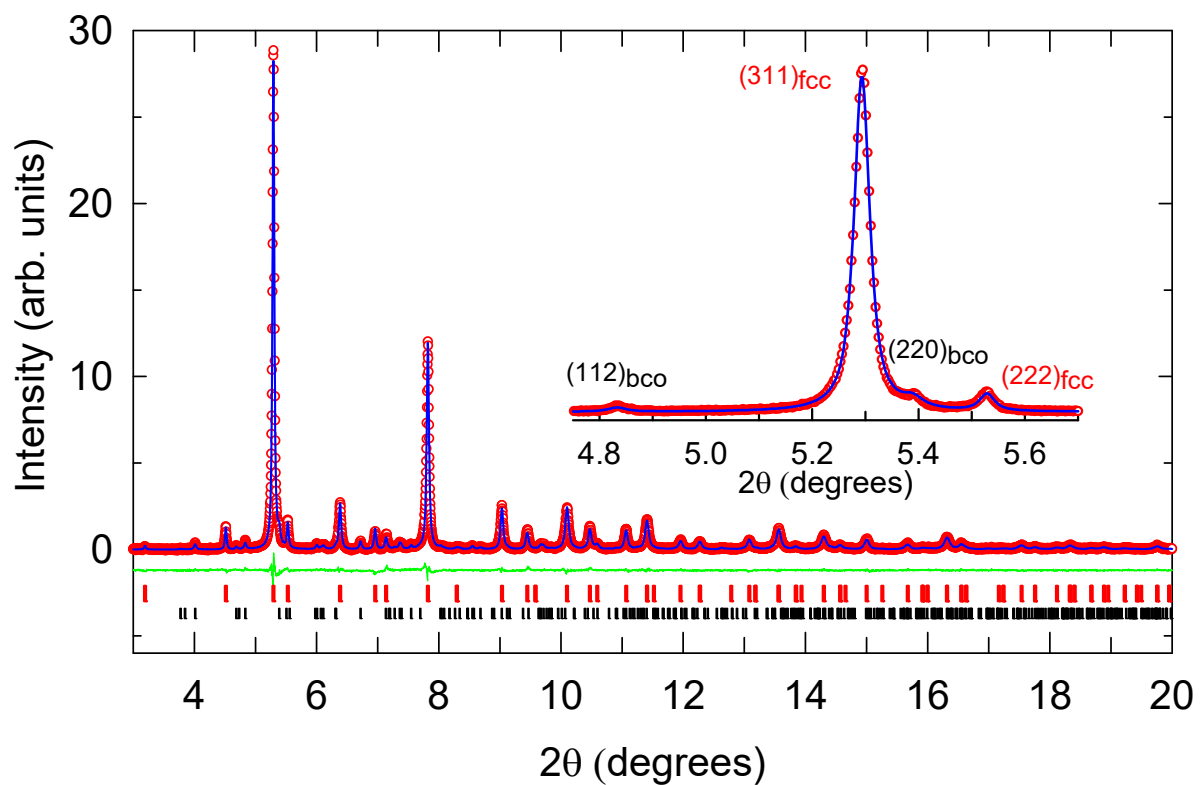

**Fig. S6** Rietveld fit to synchrotron XRPD data collected at 300 K for fcc-structured  $K_{1.63}Cs_{0.37}C_{60}$  ( $R_{wp} = 4.55\%$ ,  $R_{exp} = 3.41\%$ ,  $\lambda = 0.39996 \text{ \AA}$ ). Red circles, blue lines and green lines represent the observed, calculated and difference profiles, respectively. Ticks mark the reflection positions, from top-to-bottom, of co-existing fcc (red ticks, 94.05(1)%) and body-centred-orthorhombic (bco, black ticks, 5.97(7)%) phases. The inset displays an expanded region of the diffraction profile; observed Bragg peaks are labelled by their  $hkl$  Miller indices.



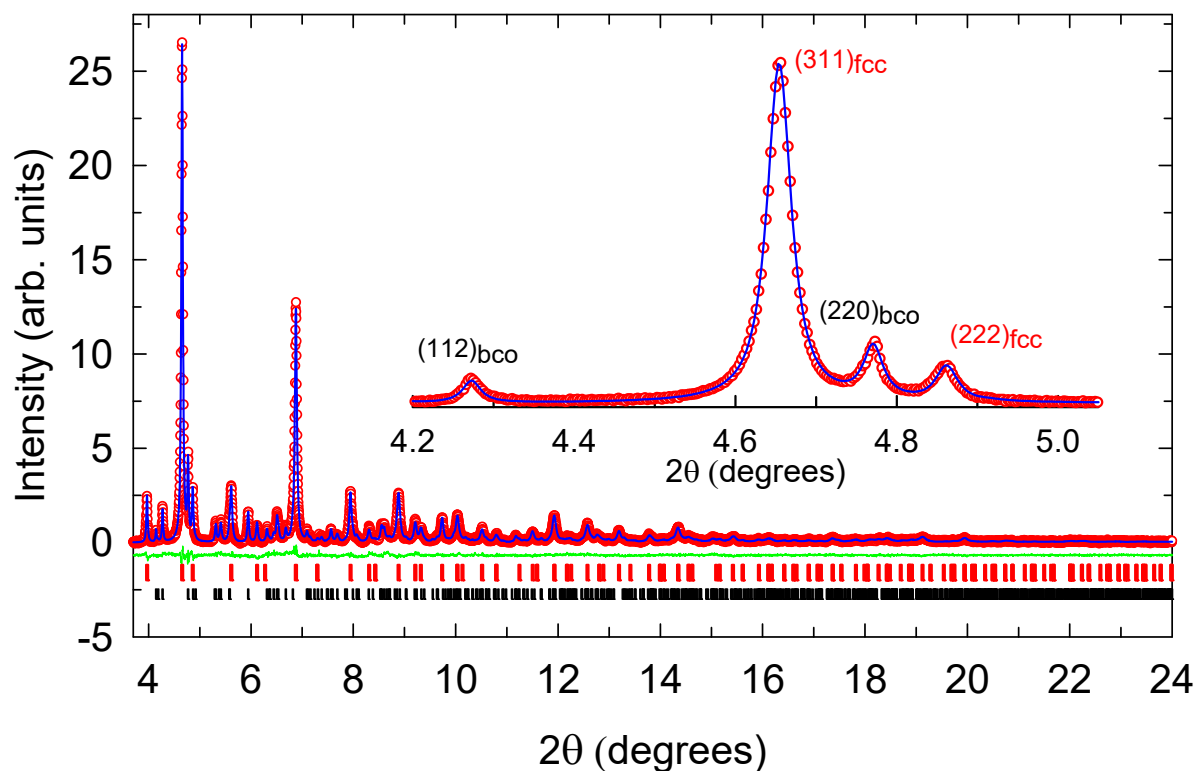

**Fig. S7** Rietveld fit to synchrotron XRPD data collected at 300 K for fcc-structured  $\text{K}_{1.28}\text{Cs}_{0.72}\text{C}_{60}$  ( $R_{\text{wp}} = 3.88\%$ ,  $R_{\text{exp}} = 2.82\%$ ,  $\lambda = 0.354197 \text{ \AA}$ ). Red circles, blue lines and green lines represent the observed, calculated and difference profiles, respectively. Ticks mark the reflection positions, from top-to-bottom, of co-existing fcc (red ticks, 83.34(4)%) and body-centred-orthorhombic (bco, black ticks, 16.69(9)%) phases. The inset displays an expanded region of the diffraction profile; observed Bragg peaks are labelled by their  $hkl$  Miller indices.

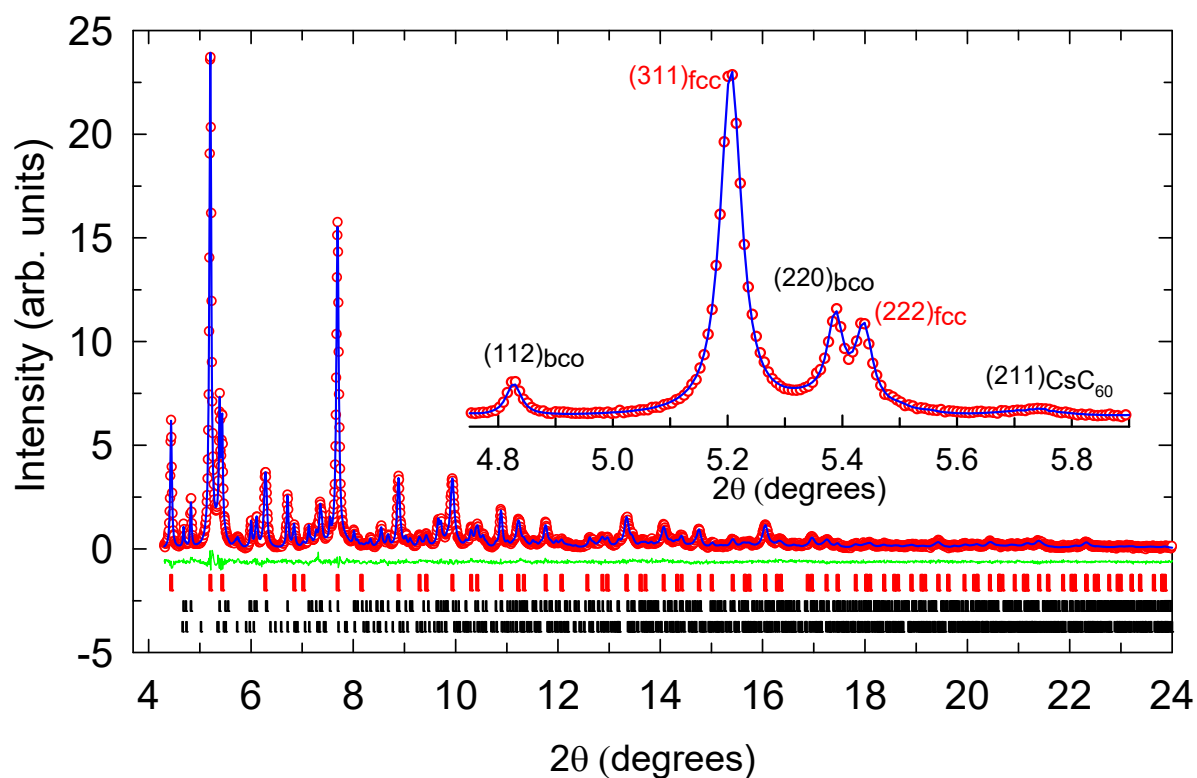

**Fig. S8** Rietveld fit to synchrotron XRPD data collected at 300 K for fcc-structured  $K_{0.64}Cs_{2.36}C_{60}$  ( $R_{wp} = 3.04\%$ ,  $R_{exp} = 2.21\%$ ,  $\lambda = 0.39984 \text{ \AA}$ ). Red circles, blue lines and green lines represent the observed, calculated and difference profiles, respectively. Ticks mark the reflection positions, from top-to-bottom, of co-existing fcc (red ticks, 71.21(7)%), body-centred-orthorhombic (bco, mid black ticks, 19.4(2)%) and  $CsC_{60}$  (lower black ticks, 9.2(3)%) phases. The inset displays an expanded region of the diffraction profile; observed Bragg peaks are labelled by their  $hkl$  Miller indices.

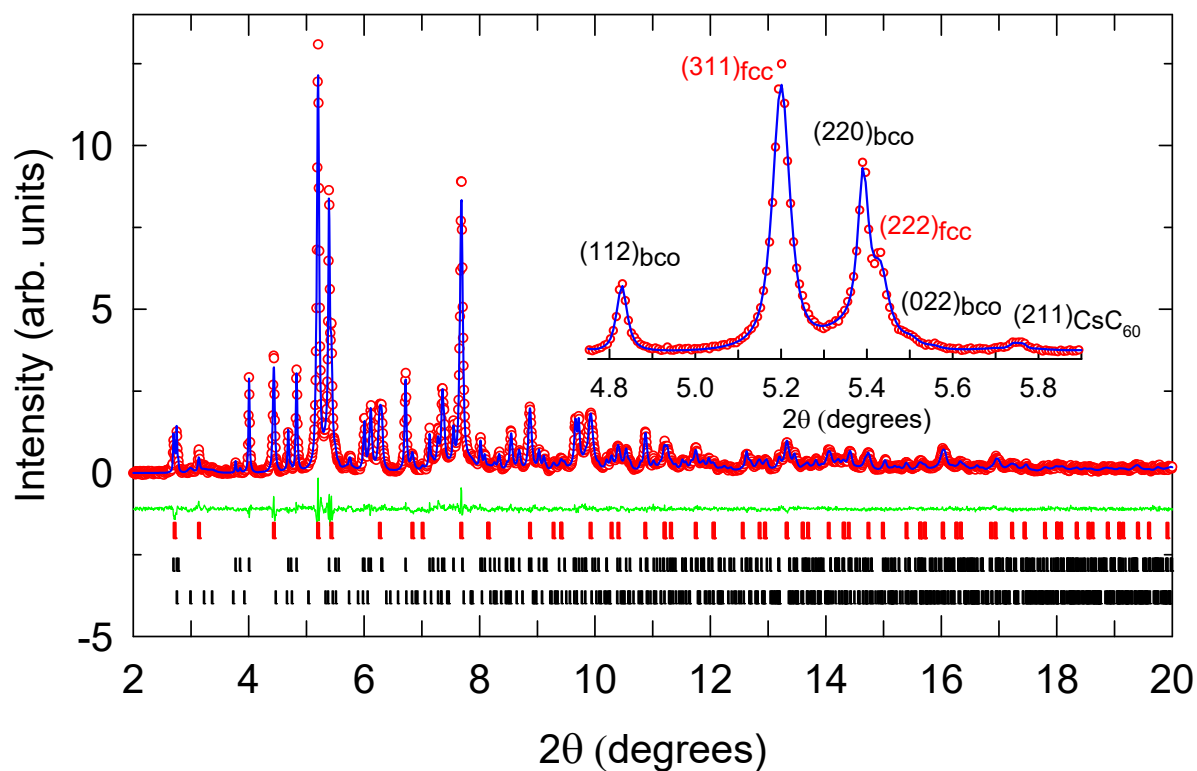

**Fig. S9** Rietveld fit to synchrotron XRPD data collected at 300 K for fcc-structured  $\text{K}_{0.53}\text{Cs}_{2.47}\text{C}_{60}$  ( $R_{\text{wp}} = 4.11\%$ ,  $R_{\text{exp}} = 2.96\%$ ,  $\lambda = 0.39984 \text{ \AA}$ ). Red circles, blue lines and green lines represent the observed, calculated and difference profiles, respectively. Ticks mark the reflection positions, from top-to-bottom, of co-existing fcc (red ticks, 54.0(2)%), body-centred-orthorhombic (bco, mid black ticks, 29.9(2)%) and  $\text{CsC}_{60}$  (lower black ticks, 16.1(3)%) phases. The inset displays an expanded region of the diffraction profile; observed Bragg peaks are labelled by their  $hkl$  Miller indices.

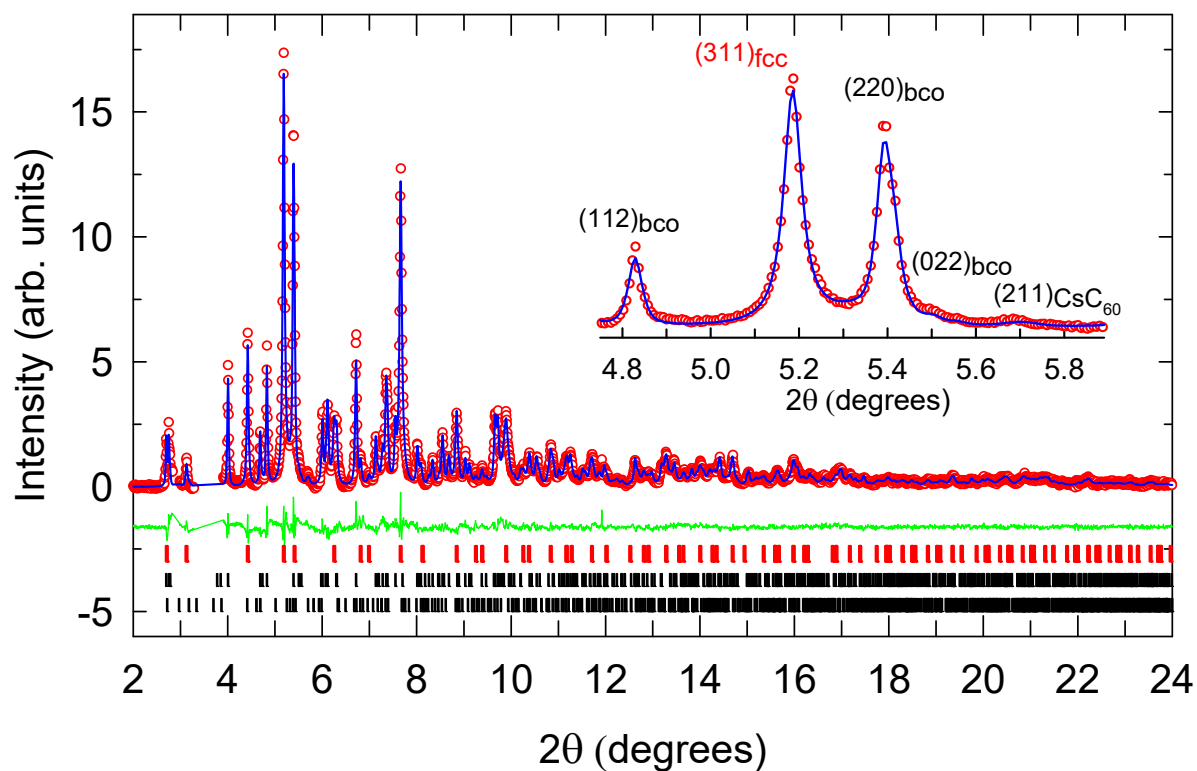

**Fig. S10** Rietveld fit to synchrotron XRPD data collected at 300 K for fcc-structured  $\text{K}_{0.35}\text{Cs}_{2.65}\text{C}_{60}$  ( $R_{\text{wp}} = 5.34\%$ ,  $R_{\text{exp}} = 4.47\%$ ,  $\lambda = 0.39999 \text{ \AA}$ ). Red circles, blue lines and green lines represent the observed, calculated and difference profiles, respectively. Ticks mark the reflection positions, from top-to-bottom, of co-existing fcc (red ticks, 53.0(2)%), body-centred-orthorhombic (bco, mid black ticks, 40.9(2)%) and  $\text{CsC}_{60}$  (lower black ticks, 5.7(3)%) phases. The inset displays an expanded region of the diffraction profile; observed Bragg peaks are labelled by their  $hkl$  Miller indices. Two broad peaks arising from the cryostat were visible at low angles ( $<4^\circ$ ) and these regions were excluded from the fitting.

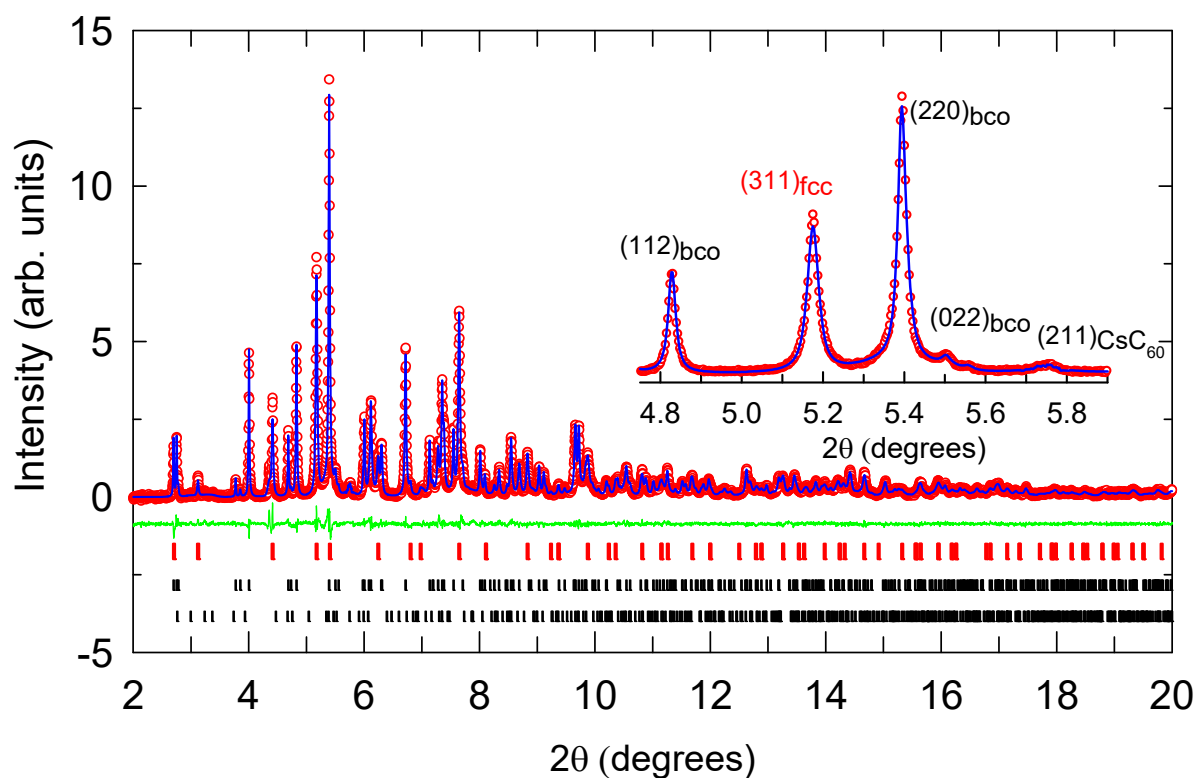

**Fig. S11** Rietveld fit to synchrotron XRPD data collected at 300 K for fcc-structured  $K_{0.22}Cs_{2.78}C_{60}$  ( $R_{wp} = 4.90\%$ ,  $R_{exp} = 3.40\%$ ,  $\lambda = 0.39999 \text{ \AA}$ ). Red circles, blue lines and green lines represent the observed, calculated and difference profiles, respectively. Ticks mark the reflection positions, from top-to-bottom, of co-existing fcc (red ticks, 31.5(2)%), body-centred-orthorhombic (bco, mid black ticks, 52.69(7)% and  $CsC_{60}$  (lower black ticks, 14.9(2)%) phases. The inset displays an expanded region of the diffraction profile; observed Bragg peaks are labelled by their  $hkl$  Miller indices.

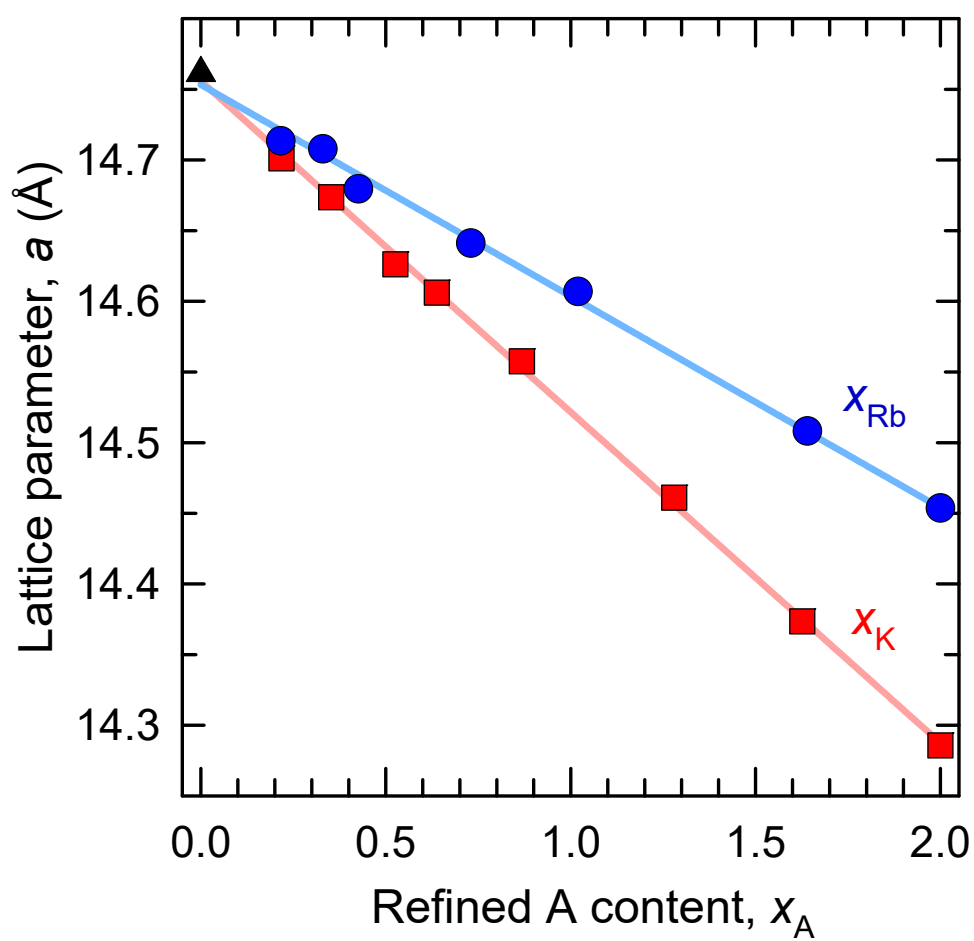

**Fig. S12** Variation of the ambient temperature *fcc* lattice parameter of  $A_xCs_{3-x}C_{60}$  ( $0 \leq x \leq 2$ ) with refined A ( $A = K, Rb$ ) content,  $x_A$ . The  $x = 0$  (black triangle) and the  $Rb_xCs_{3-x}C_{60}$  (blue circles) data are from ref. [7] and [6], respectively. The solid lines are linear fits to the data.

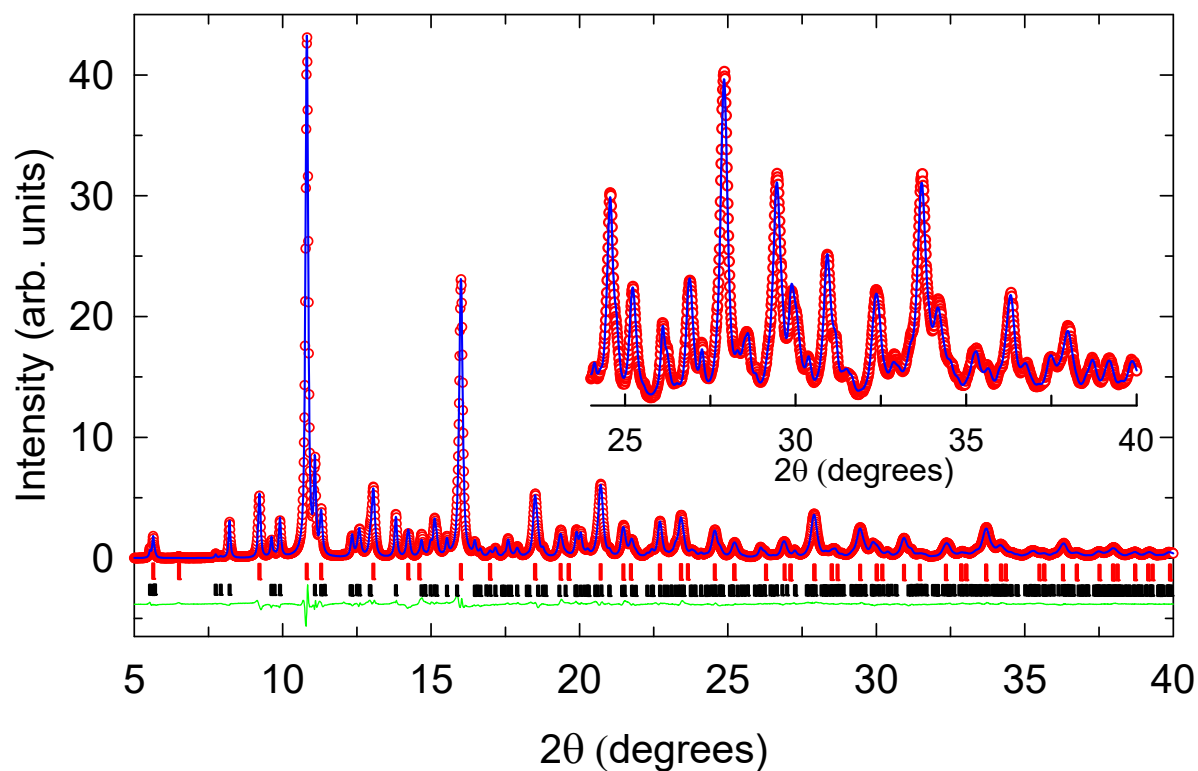

**Fig. S13** Rietveld fit to synchrotron XRPD data collected at 112 K for fcc-structured  $K_{1.28}Cs_{1.72}C_{60}$  ( $R_{wp} = 3.91\%$ ,  $R_{exp} = 2.36\%$ ,  $\lambda = 0.81887 \text{ \AA}$ ). Red circles, blue lines and green lines represent the observed, calculated and difference profiles, respectively. Ticks mark the reflection positions, from top-to-bottom, of co-existing fcc (red ticks) and body-centred-orthorhombic (bco, black ticks) phases. Co-existing phase fractions fixed to values refined from the 300 K dataset. The inset displays an expanded region of the diffraction profile at high angles.

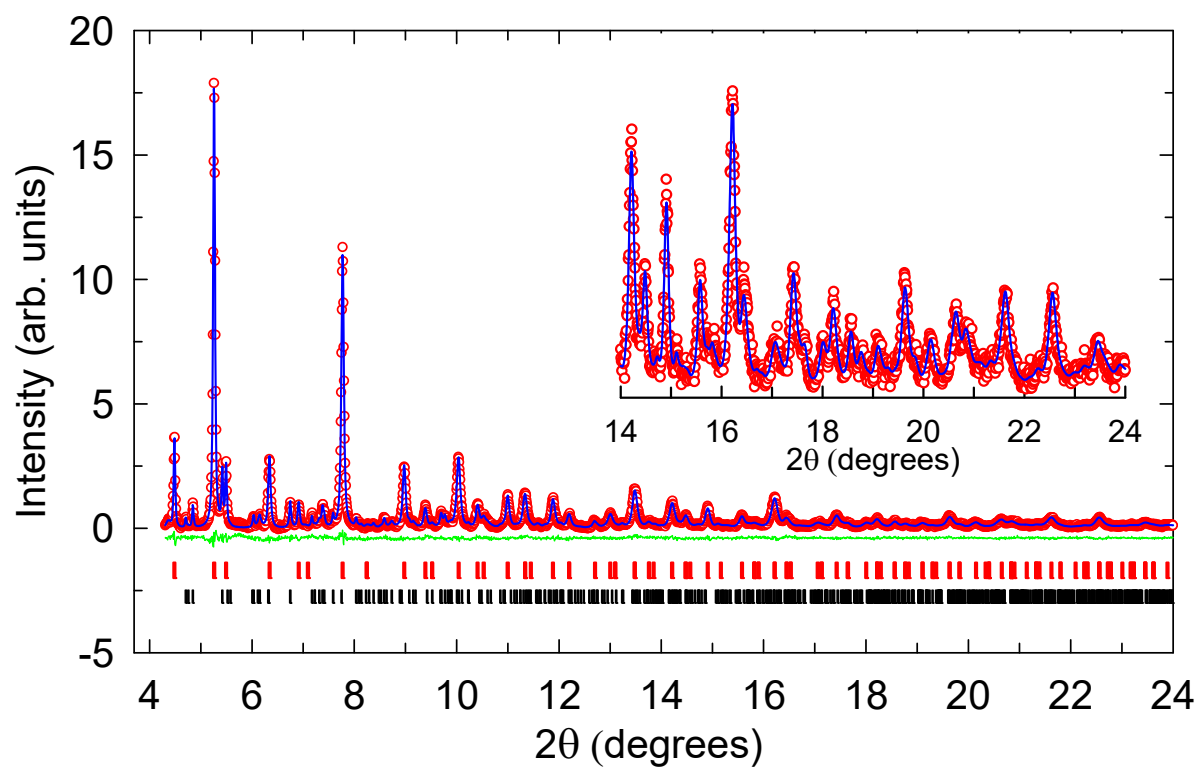

**Fig. S14** Rietveld fit to synchrotron XRPD data collected at 10 K for fcc-structured  $K_{0.87}Cs_{2.13}C_{60}$  ( $R_{wp} = 3.62\%$ ,  $R_{exp} = 2.89\%$ ,  $\lambda = 0.39984 \text{ \AA}$ ). Red circles, blue lines and green lines represent the observed, calculated and difference profiles, respectively. Ticks mark the reflection positions, from top-to-bottom, of co-existing fcc (red ticks) and body-centred-orthorhombic (bco, black ticks) phases. Co-existing phase fractions fixed to values refined from the 300 K dataset. The inset displays an expanded region of the diffraction profile at high angles.



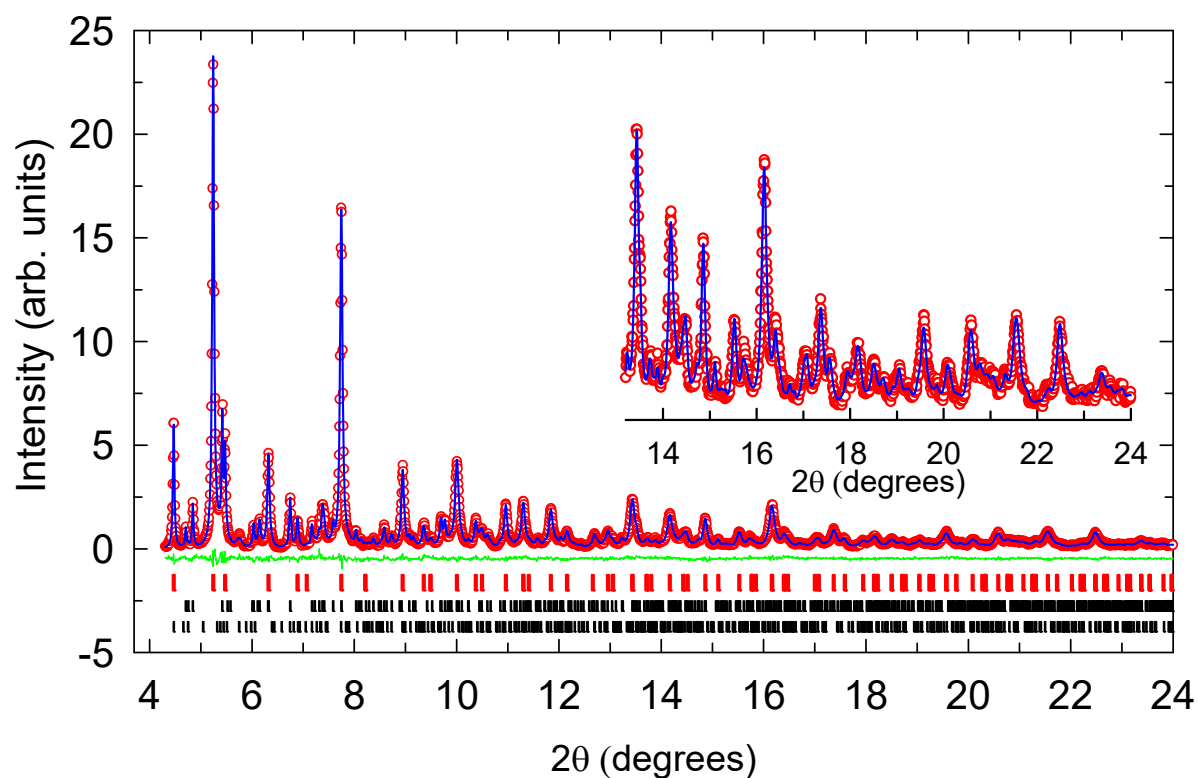

**Fig. S15** Rietveld fit to synchrotron XRPD data collected at 10 K for fcc-structured  $K_{0.64}Cs_{2.36}C_{60}$  ( $R_{wp} = 3.38\%$ ,  $R_{exp} = 2.54\%$ ,  $\lambda = 0.39984 \text{ \AA}$ ). Red circles, blue lines and green lines represent the observed, calculated and difference profiles, respectively. Ticks mark the reflection positions, from top-to-bottom, of co-existing fcc (red ticks), body-centred-orthorhombic (bco, mid black ticks) and  $CsC_{60}$  (lower black ticks) phases. Co-existing phase fractions fixed to values refined from the 300 K dataset. The inset displays an expanded region of the diffraction profile at high angles.

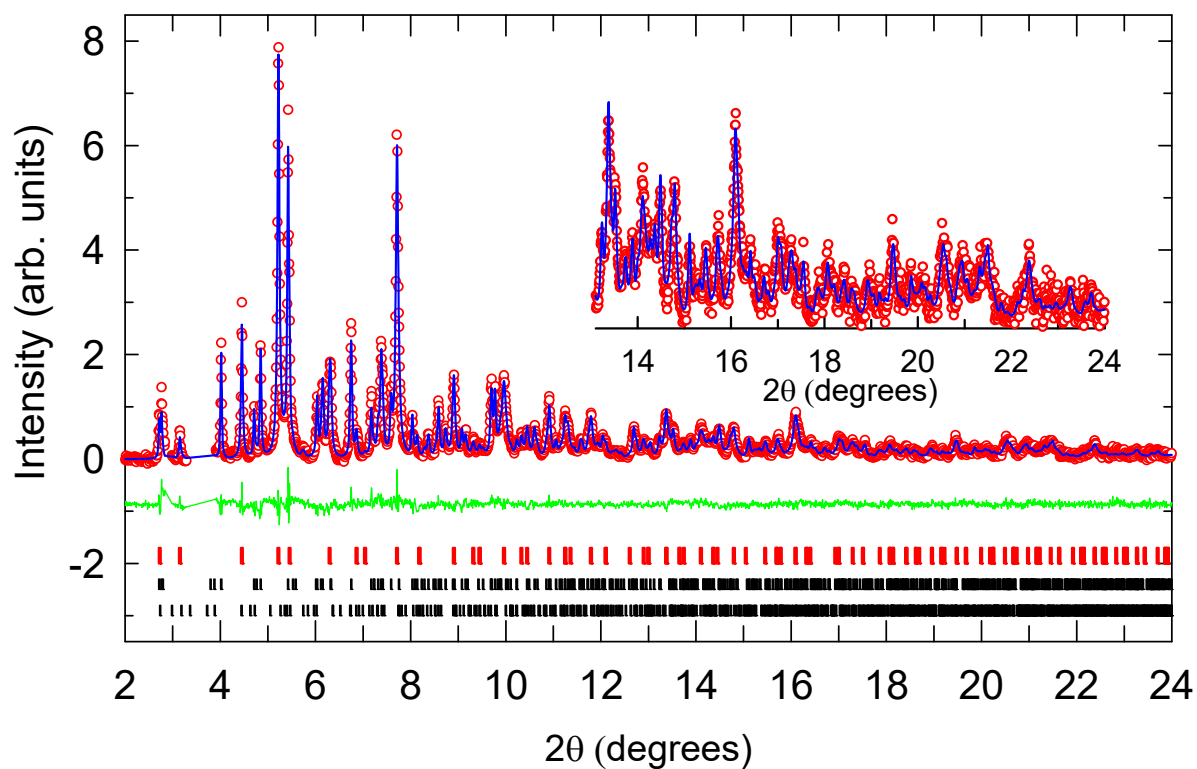

**Fig. S16** Rietveld fit to synchrotron XRPD data collected at 40 K for fcc-structured  $K_{0.35}Cs_{2.65}C_{60}$  ( $R_{wp} = 5.41\%$ ,  $R_{exp} = 3.52\%$ ,  $\lambda = 0.39999 \text{ \AA}$ ). Red circles, blue lines and green lines represent the observed, calculated and difference profiles, respectively. Ticks mark the reflection positions, from top-to-bottom, of co-existing fcc (red ticks), body-centred-orthorhombic (bco, mid black ticks) and CsC<sub>60</sub> (lower black ticks) phases. Co-existing phase fractions fixed to values refined from the 300 K dataset. Two broad peaks arising from the cryostat were visible at low angles ( $<4^\circ$ ), and these regions were excluded from the fitting. The inset displays an expanded region of the diffraction profile at high angles.

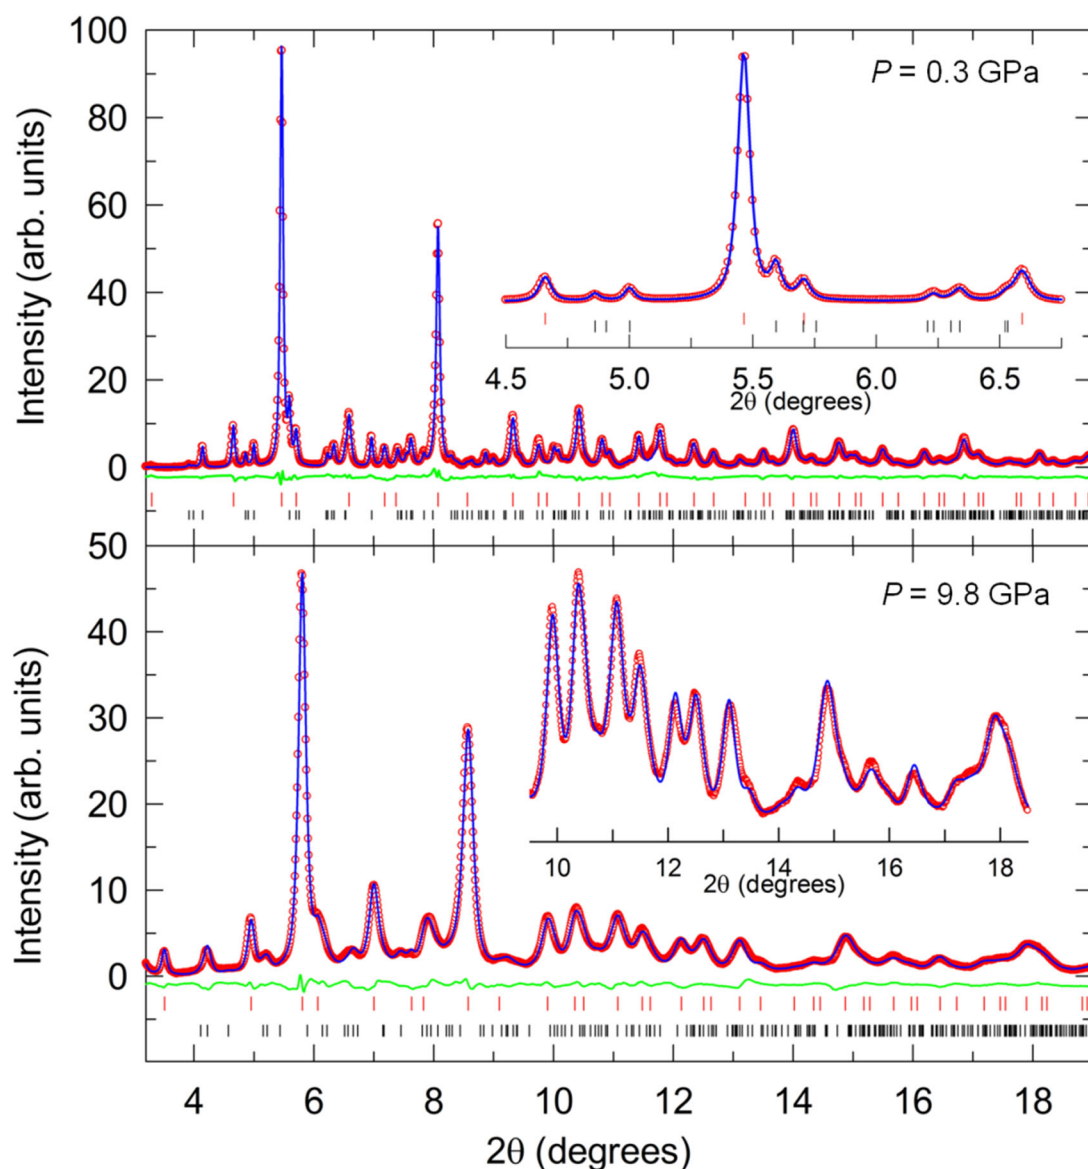

**Fig. S17** Rietveld fits to high-pressure synchrotron XRPD data collected at 7 K for fcc-structured  $K_{1.28}Cs_{1.72}C_{60}$  at 0.3 GPa (upper panel) and 9.8 GPa (lower panel) ( $R_{wp} = 0.42\%$ ,  $R_{exp} = 0.39\%$  and  $R_{wp} = 0.44\%$ ,  $R_{exp} = 0.41\%$ , respectively;  $\lambda = 0.41238 \text{ \AA}$ ). Red circles, blue lines and green lines represent the observed, calculated and difference profiles. Ticks mark the reflection positions of co-existing fcc (red ticks) and body-centred-orthorhombic (bco, black ticks) phases. The insets display expanded regions of the respective diffraction profiles at low and high Bragg angles, respectively. The fitted background contribution has been subtracted for clarity.

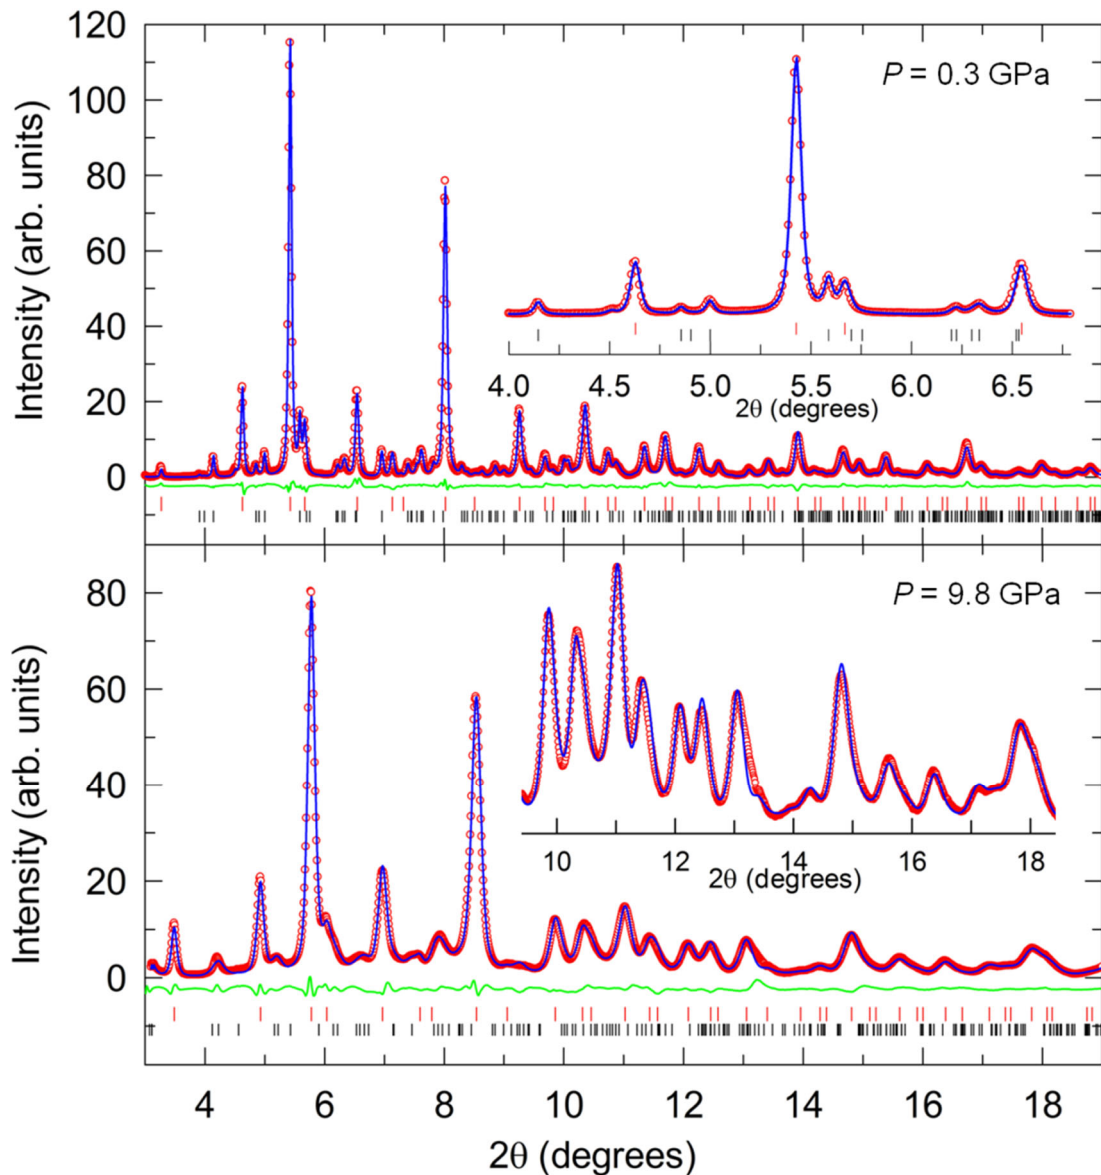

**Fig. S18** Rietveld fits to high-pressure synchrotron XRPD data collected at 7 K for fcc-structured  $\text{K}_{0.87}\text{Cs}_{2.13}\text{C}_{60}$  at 0.3 GPa (upper panel) and 9.8 GPa (lower panel) ( $R_{\text{wp}} = 0.56\%$ ,  $R_{\text{exp}} = 0.39\%$  and  $R_{\text{wp}} = 0.67\%$ ,  $R_{\text{exp}} = 0.38\%$ , respectively;  $\lambda = 0.41238$  Å). Red circles, blue lines and green lines represent the observed, calculated and difference profiles. Ticks mark the reflection positions of co-existing fcc (red ticks) and body-centred-orthorhombic (bco, black ticks) phases. The insets display expanded regions of the respective diffraction profiles at low and high Bragg angles, respectively. The fitted background contribution has been subtracted for clarity.

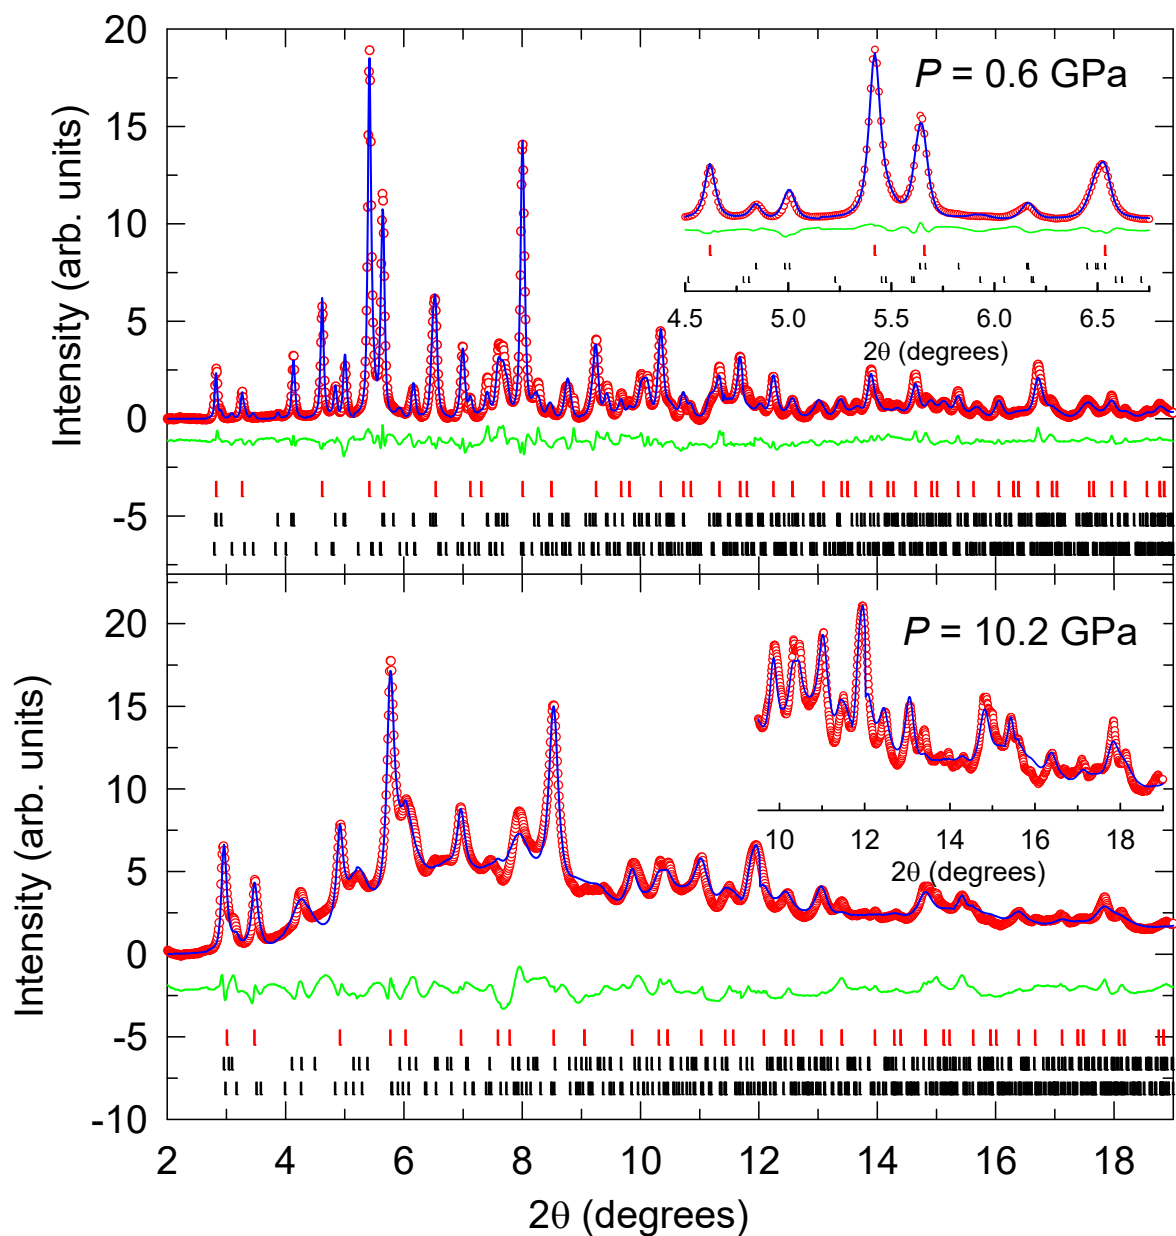

**Fig. S19** Rietveld fits to high-pressure synchrotron XRPD data collected at 7 K for fcc-structured  $\text{K}_{0.35}\text{Cs}_{2.65}\text{C}_{60}$  at 0.6 GPa (upper panel) and 10.2 GPa (lower panel) ( $R_{\text{wp}} = 0.45\%$ ,  $R_{\text{exp}} = 0.45\%$  and  $R_{\text{wp}} = 0.92\%$ ,  $R_{\text{exp}} = 0.45\%$ , respectively;  $\lambda = 0.41261$  Å). Red circles, blue lines and green lines represent the observed, calculated and difference profiles. Ticks mark the reflection positions of co-existing fcc (red ticks), body-centred-orthorhombic (bco, mid black ticks), and  $\text{CsC}_{60}$  (lower black ticks) phases. The insets display expanded regions of the respective diffraction profiles at low and high Bragg angles, respectively. The fitted background contribution has been subtracted for clarity.

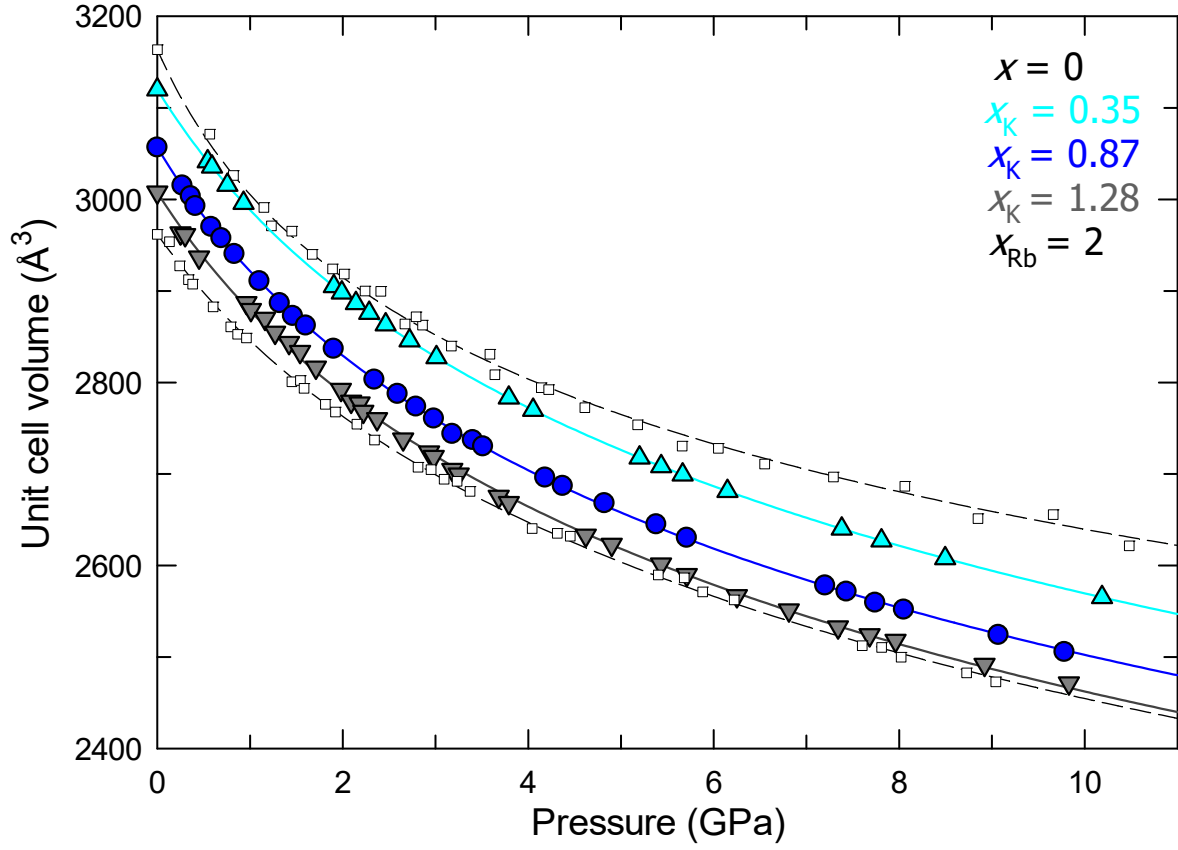

**Fig. S20** Pressure dependence of the 7 K unit cell volume of  $K_xCs_{3-x}C_{60}$  ( $x_K = 0.35, 0.87, \text{ and } 1.28$ ). Data for fcc-structured  $Cs_3C_{60}$  at 15 K (dashed line through squares) from ref. [7] and for  $Rb_2CsC_{60}$  at 7 K (dashed line through squares) from ref. [6] are also included for comparison. The lines through the data points for the  $K_xCs_{3-x}C_{60}$  family are the results of least-squares fits to second-order Murnaghan equations-of-state with zero-pressure isothermal bulk moduli,  $K_0$  of 19.0(1), 17.9(2), and 18.7(6) GPa, and pressure derivatives,  $K'_0$  of 9.0(1), 8.94(9), and 8.6(2) for  $x_K = 0.35, 0.87, \text{ and } 1.28$ , respectively (Table S14). Statistical errors in  $V$  from Rietveld analysis are smaller than the data point size.

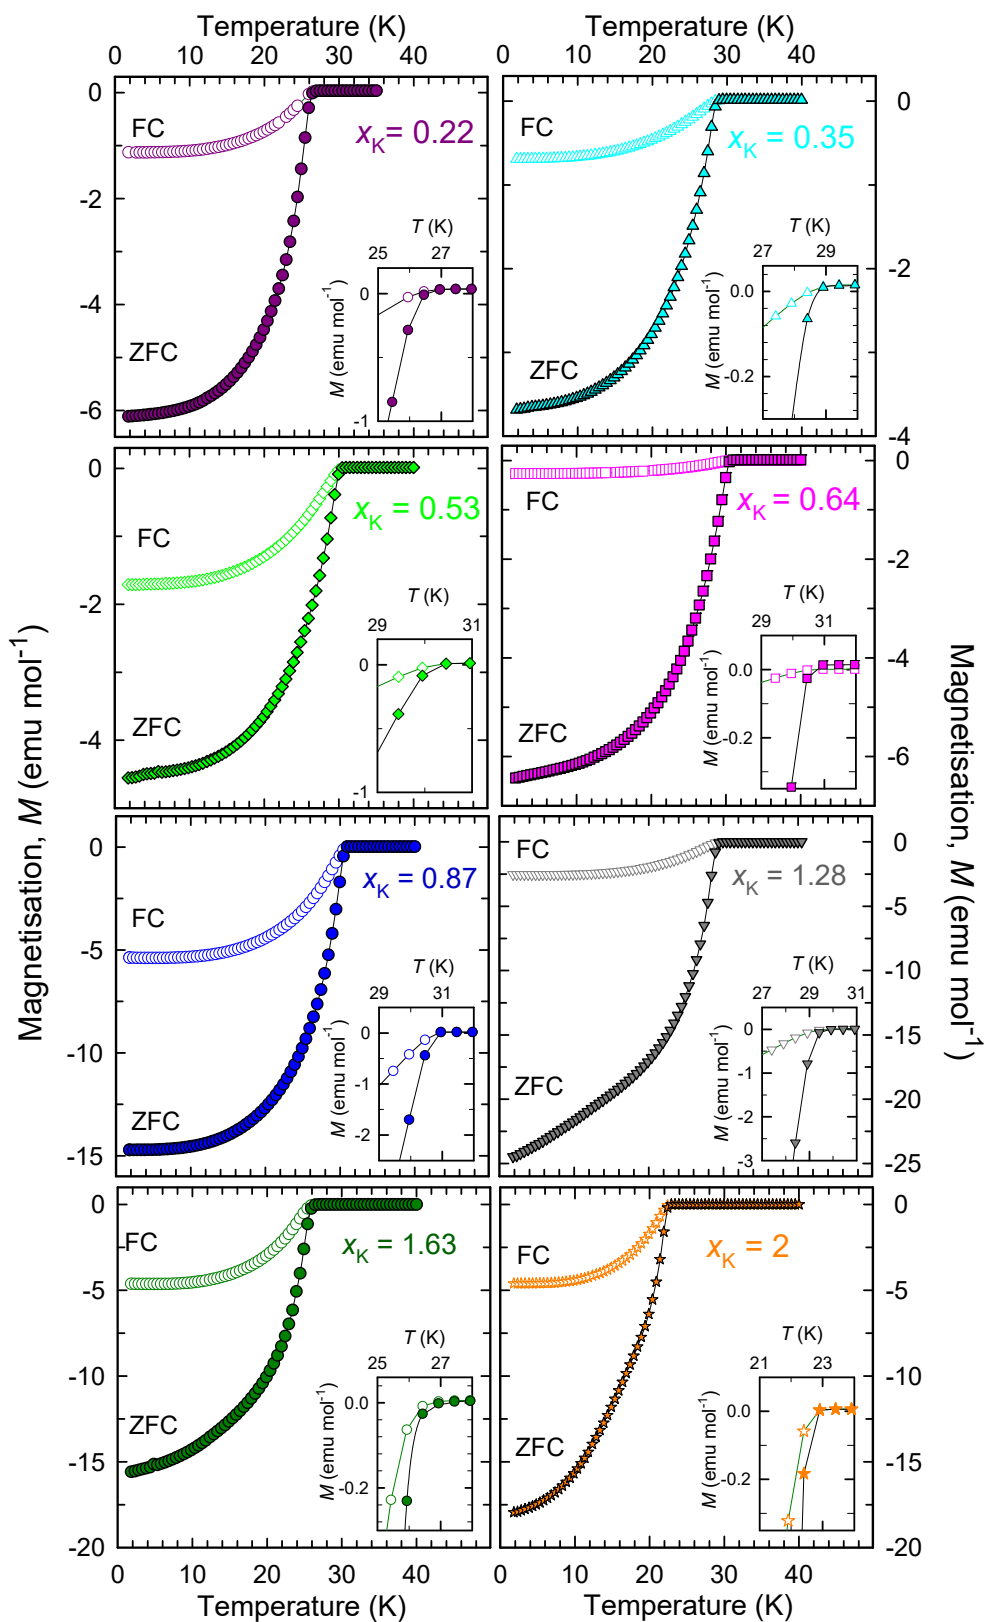

**Fig. S21** Temperature dependence of the ZFC and FC magnetisation,  $M$ , of the  $K_xCs_{3-x}C_{60}$  samples divided by the applied magnetic field. The insets show expanded regions of the respective  $M(T)$  data near the superconducting  $T_c$ .

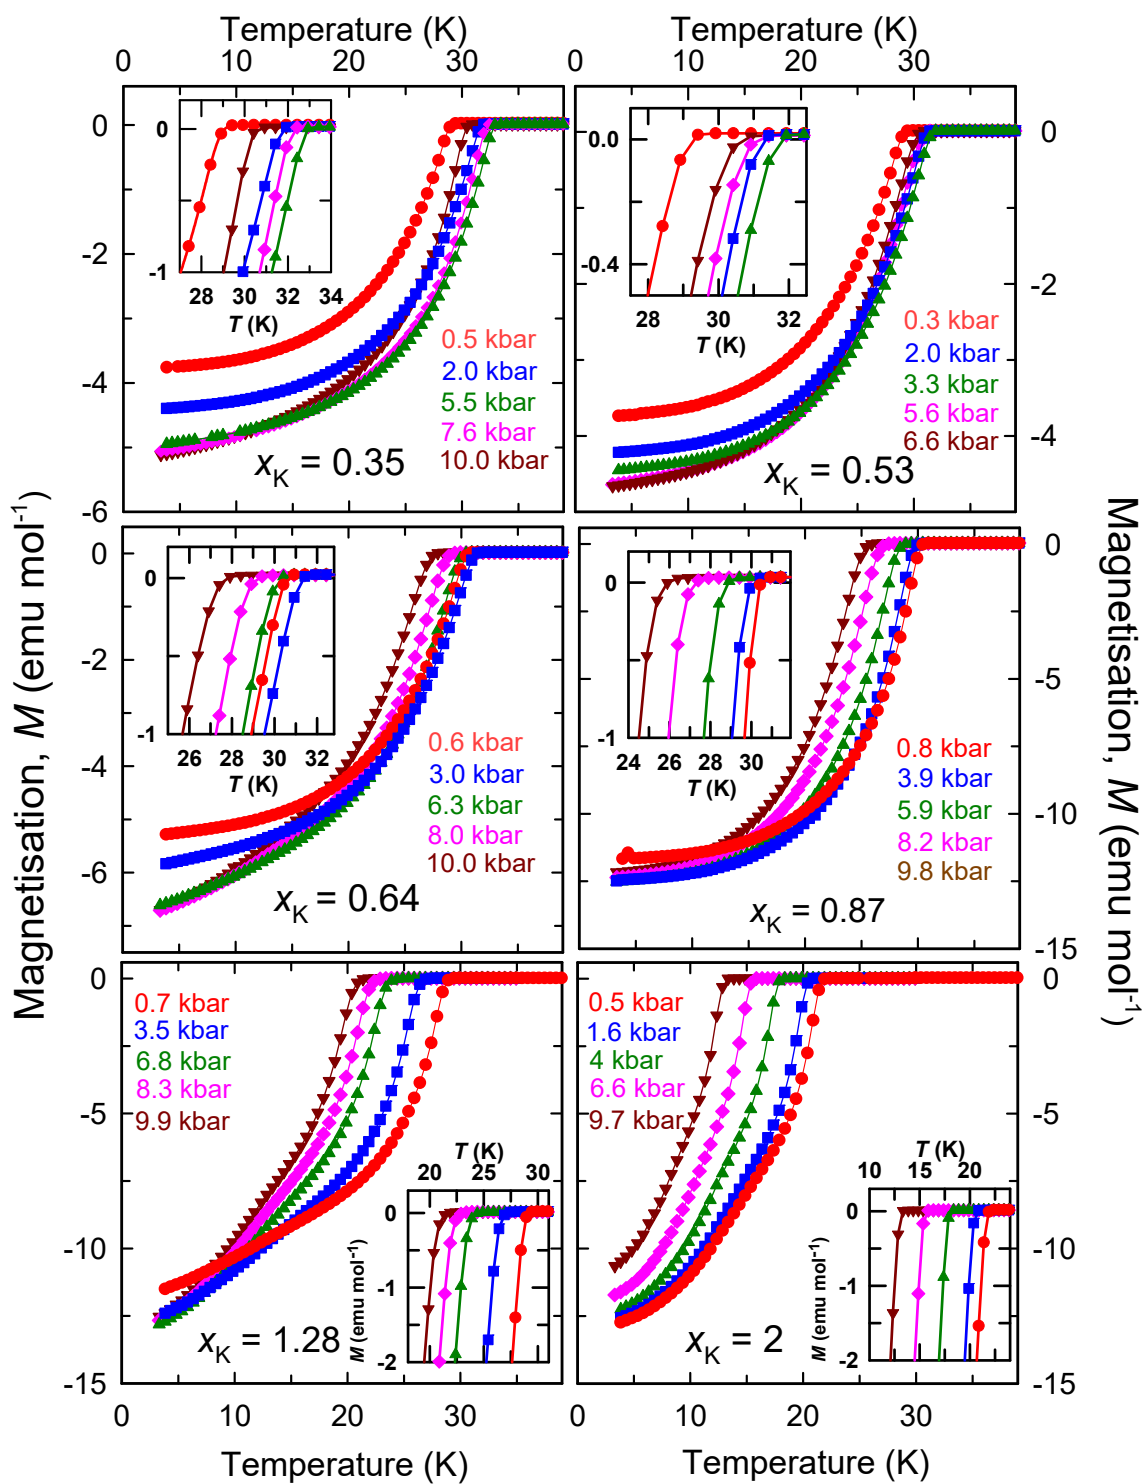

**Fig. S22** Temperature dependence of the ZFC magnetisation,  $M$ , divided by the applied magnetic field (20 Oe) at selected pressures for the  $K_xCS_{3-x}C_{60}$  samples. The insets show expanded regions of the respective  $M(T)$  data near the superconducting  $T_c$ .



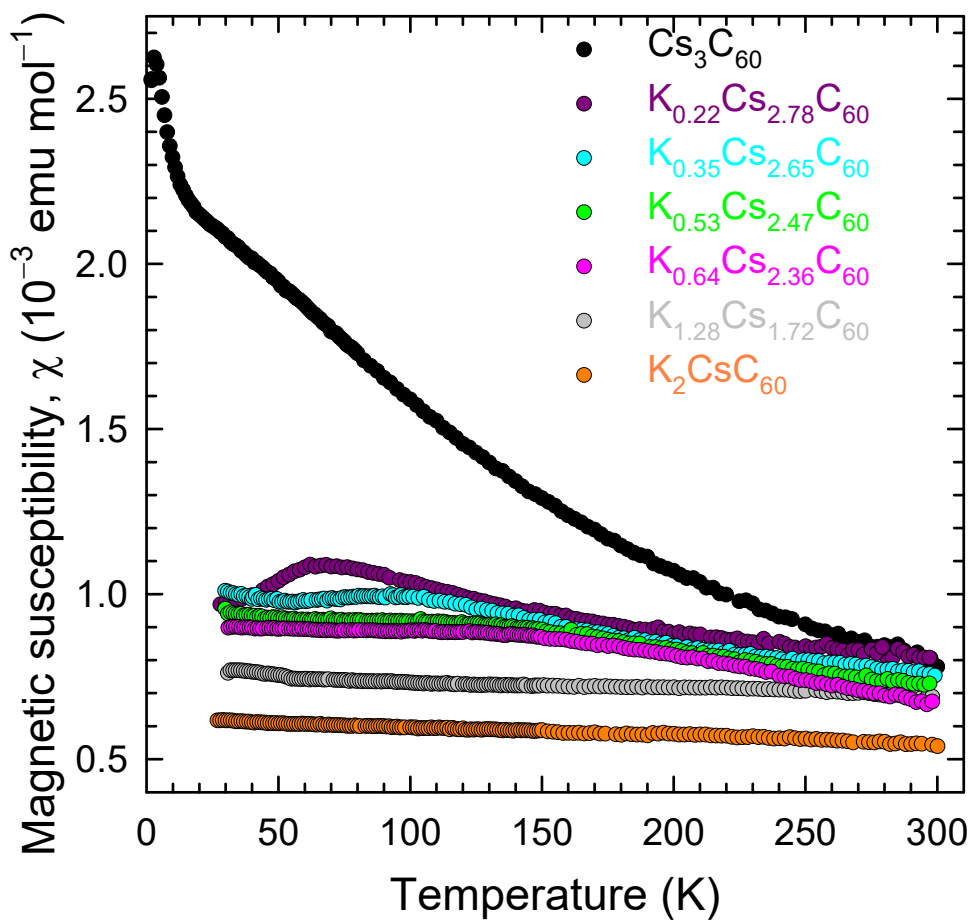

**Fig. S23** Temperature dependence of the magnetic susceptibility,  $\chi(T)$ , of the  $\text{K}_x\text{Cs}_{3-x}\text{C}_{60}$  ( $0 \leq x \leq 2$ ) phase assemblages. The data for fcc-structured  $\text{Cs}_3\text{C}_{60}$  are taken from ref. [7].

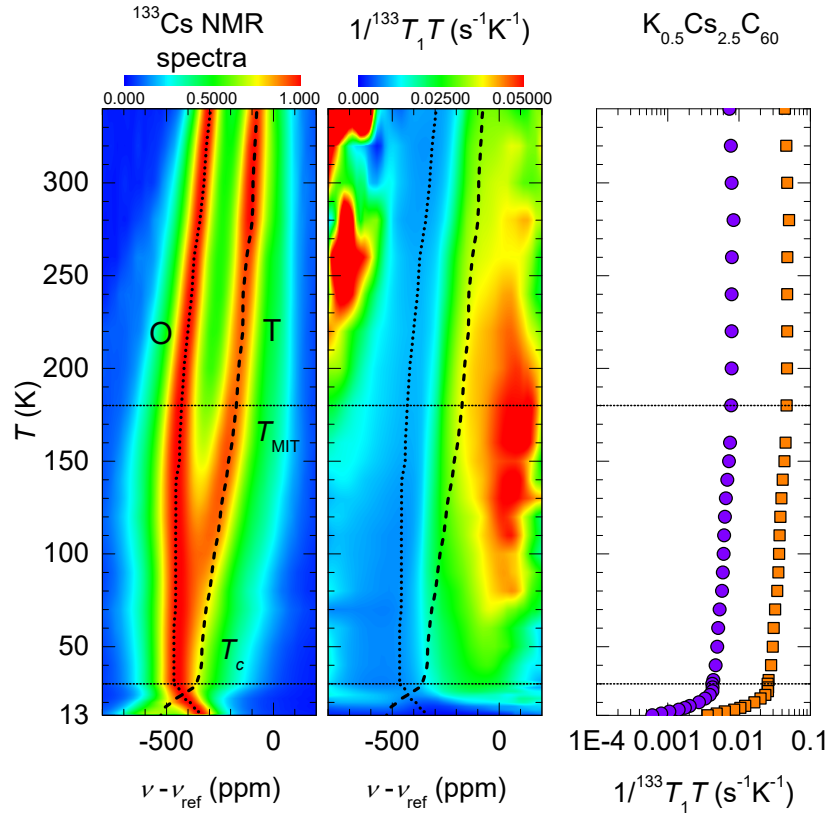

**Fig. S24** (*Left panel*) Evolution of the normalised  $^{133}\text{Cs}$  NMR spectral intensity of  $\text{K}_{0.64}\text{Cs}_{2.36}\text{C}_{60}$  with temperature shows significant overlap between the O and T peaks below  $\sim 100$  K. Dotted and dashed lines mark the temperature variation of the centre of gravity of the O and T components, respectively. (*Middle panel*) Plot of  $^{133}\text{Cs}$  spin-lattice relaxation rate divided by temperature,  $1/^{133}T_1T$ , extracted at various points of the  $^{133}\text{Cs}$  NMR spectra as a function of temperature demonstrates that  $1/^{133}T_1$  for the O site is by a factor of 6(1) smaller than that for the more tightly packed T sites. Red-coloured patches are analysis artefacts in parts where the  $^{133}\text{Cs}$  NMR spectral intensity is extremely small. (*Right panel*) Temperature dependence of  $1/^{133}T_1T$  for O (purple circles) and T (orange squares) peaks when the ratio between  $1/^{133}T_1$  for the T and O sites is fixed to 6. In all panels, horizontal thin dotted lines mark the metal-insulator crossover temperature,  $T^* = 170$  K and zero-field superconducting critical temperature,  $T_c = 30.5$  K.

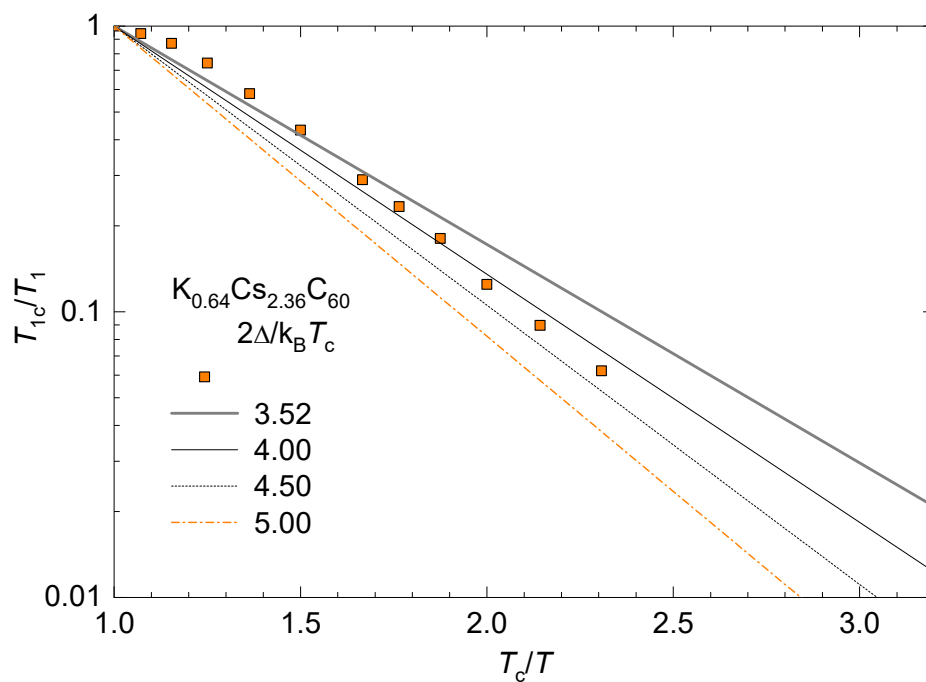

**Fig. S25**  $^{133}\text{Cs}$  spin-lattice relaxation rate,  $1/^{133}\text{T}_1$  normalized to its value at  $T_c$  vs inverse temperature,  $T_c/T$  for  $\text{K}_{0.64}\text{Cs}_{2.36}\text{C}_{60}$  (orange squares). Lines show the expected slopes of  $1/^{133}\text{T}_1 \propto \exp[-\Delta_0/k_B T]$  calculated for  $2\Delta_0/k_B T_c$  of 3.52 (thick solid line), 4 (dashed line), 4.5 (dotted line) and 5 (orange dash-dot line). The slope of data for  $(T_c/T) > 1.25$  matches  $2\Delta_0/k_B T_c = 5$ .

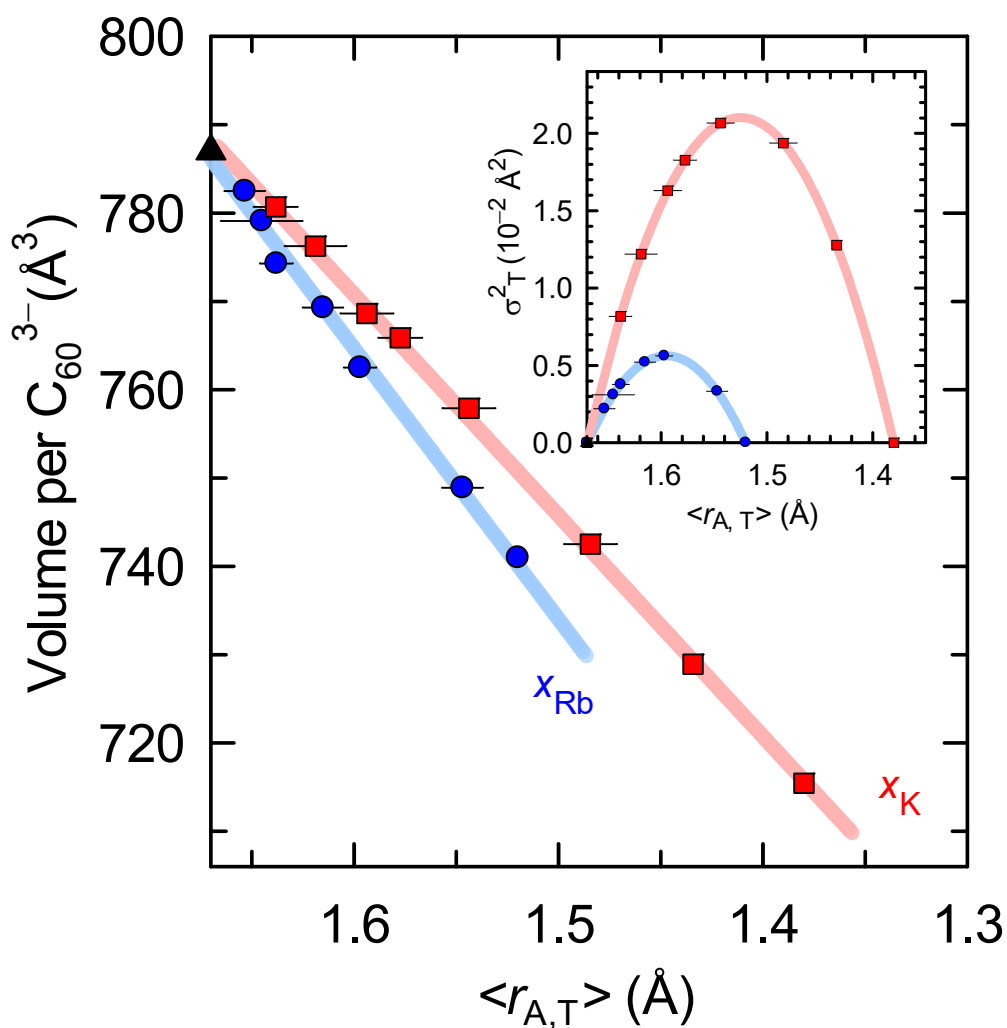

**Fig. S26** Variation of the packing density,  $V$  per  $C_{60}^{3-}$  at  $T = T_c$  with average ionic radius of the ions in the tetrahedral interstices,  $\langle r_{A,T} \rangle$  for the  $K_{3-x}Cs_xC_{60}$  (red) and  $Rb_{3-x}Cs_xC_{60}$  (blue) compositions. Solid lines through the data points are linear fits to the data yielding  $dV/d\langle r_{A,T} \rangle = 250(3)$  and  $306(9) \text{\AA}^2$  for  $A = K$  (red squares) and Rb (blue circles [6]), respectively. The black triangle is the datum for  $Cs_3C_{60}$  [7]. The *inset* shows the variation of cation disorder at the T-site,  $\sigma_T^2$  with the average size of the T-site cation radius,  $\langle r_{A,T} \rangle$ .
